# Supplementary material for: Experimental and theoretical studies on the nucleofugality ratio in the aminolysis reactions of O-(4-cyanophenyl) O-(3-nitrophenyl) thionocarbonate with amines in aqueous ethanol
Source: Royal Society of Chemistry journal article supplement (doi:10.1039/c7nj00045f), 2017-01-01
Supplement: c7nj00045f1.pdf [file c7nj00045f1.pdf]

## Electronic Supporting Information:

### **Experimental and theoretical study on the nucleofugality ratio in the aminolysis reactions of *O*-(4-cyanophenyl) *O*-(3-nitrophenyl) thiocarbonate with amines in aqueous ethanol.**

#### **Table of contents**

|                                                                                                                                                                                                                                                                               |    |
|-------------------------------------------------------------------------------------------------------------------------------------------------------------------------------------------------------------------------------------------------------------------------------|----|
| <b>Figure S1.</b> HPLC analysis of the reaction of <b>1</b> with morpholine in aqueous ethanol 44wt. %, 25.0 °C, $\mu = 0.2$ M in KCl.                                                                                                                                        | S4 |
| <b>Table S-1.</b> Experimental conditions and $k_{\text{obs}}$ values for the reactions <i>O</i> -(3-nitrophenyl) <i>O</i> -(4-cyanophenyl) thiocarbonate ( <b>1</b> ) with piperidine, in aqueous ethanol 44wt. %, 25.0 °C, $\mu = 0.2$ M in KCl.                            | S5 |
| <b>Table S-2.</b> Experimental conditions and $k_{\text{obs}}$ values for the reactions <i>O</i> -(3-nitrophenyl) <i>O</i> -(4-cyanophenyl) thiocarbonate ( <b>1</b> ) with piperazine, in aqueous ethanol 44wt. %, 25.0 °C, $\mu = 0.2$ M in KCl.                            | S5 |
| <b>Table S-3.</b> Experimental conditions and $k_{\text{obs}}$ values for the reactions <i>O</i> -(3-nitrophenyl) <i>O</i> -(4-cyanophenyl) thiocarbonate ( <b>1</b> ) with 2-(hydroxyethyl)piperazine, in aqueous ethanol 44wt. %, 25.0 °C, $\mu = 0.2$ M in KCl.            | S6 |
| <b>Table S-4.</b> Experimental conditions and $k_{\text{obs}}$ values for the reactions <i>O</i> -(3-nitrophenyl) <i>O</i> -(4-cyanophenyl) thiocarbonate ( <b>1</b> ) with morpholine, in aqueous ethanol 44wt. %, 25.0 °C, $\mu = 0.2$ M in KCl.                            | S6 |
| <b>Table S-5.</b> Experimental conditions and $k_{\text{obs}}$ values for the reactions <i>O</i> -(3-nitrophenyl) <i>O</i> -(4-cyanophenyl) thiocarbonate ( <b>1</b> ) with N-formylpiperazine, in aqueous ethanol 44wt. %, 25.0 °C, $\mu = 0.2$ M in KCl.                    | S7 |
| <b>Table S-6.</b> Experimental conditions and $k_{\text{obs}}$ values for the reactions <i>O</i> -(3-nitrophenyl) <i>O</i> -(4-cyanophenyl) thiocarbonate ( <b>1</b> ) with phenylendiamine, in aqueous ethanol 44wt. %, 25.0 °C, $\mu = 0.2$ M in KCl, borate buffer 0.07M.  | S7 |
| <b>Table S-7.</b> Experimental conditions and $k_{\text{obs}}$ values for the reactions <i>O</i> -(3-nitrophenyl) <i>O</i> -(4-cyanophenyl) thiocarbonate ( <b>1</b> ) with 4-methoxyaniline, in aqueous ethanol 44wt. %, 25.0 °C, $\mu = 0.2$ M in KCl, borate buffer 0.07M. | S8 |
| <b>Table S-8.</b> Experimental conditions and $k_{\text{obs}}$ values for the reactions <i>O</i> -(3-nitrophenyl) <i>O</i> -(4-cyanophenyl) thiocarbonate ( <b>1</b> ) with 4-methylaniline, in aqueous ethanol 44wt. %, 25.0 °C, $\mu = 0.2$ M in KCl, borate buffer 0.07M.  | S8 |

|                                                                                                                                                                                                                                                                                                                                                |     |
|------------------------------------------------------------------------------------------------------------------------------------------------------------------------------------------------------------------------------------------------------------------------------------------------------------------------------------------------|-----|
| <b>Table S-9.</b> Experimental conditions and $k_{\text{obs}}$ values for the reactions <i>O</i> -(3-nitrophenyl) <i>O</i> -(4-cyanophenyl) thiocarbonate ( <b>1</b> ) with aniline, in aqueous ethanol 44wt. %, 25.0 °C, $\mu = 0.2$ M in KCl, borate buffer 0.07M.                                                                           | S9  |
| <b>Table S-10.</b> Experimental conditions and $k_{\text{obs}}$ values for the reactions <i>O</i> -(3-nitrophenyl) <i>O</i> -(4-cyanophenyl) thiocarbonate ( <b>1</b> ) with 3-amino acetophenone, in aqueous ethanol 44wt. %, 25.0 °C, $\mu = 0.2$ M in KCl, borate buffer 0.07M.                                                             | S9  |
| <b>Estimation of <math>pK_a</math> of <math>T^\pm</math></b>                                                                                                                                                                                                                                                                                   | S10 |
| <b>Figure S2.</b> Corrected Bronsted plot for the reactions of <b>1</b> with SAA. The $k_1$ values, as well as those of the $pK_a$ of the conjugate acids of these amines, were statistically corrected with $q = 2$ for piperazine ( $q = 1$ for all the other SAA) and $p = 2$ for all the conjugate acids of the amines.                    | S11 |
| <b>Figure S3.</b> Corrected Bronsted plot for the reactions of <b>1</b> with anilines. The $k_N$ values, as well as those of the $pK_a$ of the conjugate acids of these anilines, were statistically corrected with $q = 2$ for 4-phenyldiamine ( $q = 1$ for all the other anilines) and $p = 3$ for all the conjugate acids of the anilines. | S12 |
| <b>Table S-11.</b> Experimental conditions and $k_{\text{obs}}$ values for the reactions <i>O</i> -(3-nitrophenyl) <i>O</i> -(4-cyanophenyl) thiocarbonate ( <b>1</b> ) with aniline, in aqueous ethanol 44wt. %, 25.0 °C, $\mu = 0.2$ M in KCl, borate buffer 0.14 and 0.21M.                                                                 | S13 |
| <b>Figure S4.</b> Dependence of $k_N$ values with buffer concentration.                                                                                                                                                                                                                                                                        | S14 |
| <b>Figure S5.</b> Energy profile, of systems containing $T^-$ , as a function of the explicit water molecules included.                                                                                                                                                                                                                        | S15 |
| <b>Figure S6.</b> Structure of the TS2 for the departure of 4-CNPO <sup>-</sup> and 3-NPO <sup>-</sup> with a) assistance of one explicit water molecule, b) assistance of three explicit water assistance water molecules.                                                                                                                    | S16 |
| <b>Figure S7.</b> Structure of the TS2 for the departure of 4-CNPO <sup>-</sup> (left) and 3-NPO <sup>-</sup> (right) with a) the assistance of one explicit water molecule and one explicit ethanol molecule, b) the assistance of two explicit ethanol molecules                                                                             | S17 |
| <b>Table S-12.</b> Energy gap (kcal mol <sup>-1</sup> ) of TS2 as a function of the number of assisting water and ethanol molecules.                                                                                                                                                                                                           | S18 |
| <b>Table S-13</b> Cartesian coordinates energy (u.a.) and number of imaginary frequencies (NIMAG) in the Transition State (TS2) for the departure of 4CNPO <sup>-</sup> without explicit water molecules.                                                                                                                                      | S18 |
| <b>Table S-14.</b> Cartesian coordinates energy (u.a.) and number of imaginary frequencies (NIMAG) in the Transition State (TS2) for the departure of 3NPO <sup>-</sup> without explicit water molecules.                                                                                                                                      | S20 |
| <b>Table S-15.</b> Cartesian coordinates energy (u.a.) and number of imaginary frequencies (NIMAG) in the Transition State (TS2) for the departure of 4CNPO <sup>-</sup> with one explicit water                                                                                                                                               | S22 |

|                                                                                                                                                                                                                                                    |     |
|----------------------------------------------------------------------------------------------------------------------------------------------------------------------------------------------------------------------------------------------------|-----|
| molecule                                                                                                                                                                                                                                           |     |
| <b>Table S-16.</b> Cartesian coordinates energy (u.a.) and number of imaginary frequencies (NIMAG) in the Transition State (TS2) for the departure of 3-NPO <sup>-</sup> with one explicit water molecule                                          | S24 |
| <b>Table S-17.</b> Cartesian coordinates energy (u.a.) and number of imaginary frequencies (NIMAG) in the Transition State (TS2) for the departure of 4-CNPO <sup>-</sup> with two explicit water molecules.                                       | S26 |
| <b>Table S-18.</b> Cartesian coordinates energy (u.a.) and number of imaginary frequencies (NIMAG) in the Transition State (TS2) for the departure of 3-NPO <sup>-</sup> with two explicit water molecules.                                        | S28 |
| <b>Table S-19.</b> Cartesian coordinates energy (u.a.) and number of imaginary frequencies (NIMAG) in the Transition State (TS2) for the departure of 4-CNPO <sup>-</sup> with three explicit water molecules.                                     | S30 |
| <b>Table S-20.</b> Cartesian coordinates energy (u.a.) and number of imaginary frequencies (NIMAG) in the Transition State (TS2) for the departure of 3-NPO <sup>-</sup> with three explicit water molecules.                                      | S32 |
| <b>Table S-21.</b> Cartesian coordinates energy (u.a.) and number of imaginary frequencies (NIMAG) in the Transition State (TS2) for the departure of 4-CNPO <sup>-</sup> with four explicit water molecules.                                      | S34 |
| <b>Table S-22.</b> Cartesian coordinates energy (u.a.) and number of imaginary frequencies (NIMAG) in the Transition State (TS2) for the departure of 3-NPO <sup>-</sup> with four explicit water molecules.                                       | S36 |
| <b>Table S-23.</b> Cartesian coordinates, energy (u.a.) and number of imaginary frequencies (NIMAG) for Transition State (TS2) for the departure of 4CNPO <sup>-</sup> with one explicit ethanol molecule                                          | S38 |
| <b>Table S-24.</b> Cartesian coordinates, energy (u.a.) and number of imaginary frequencies (NIMAG) for Transition State (TS2) for the departure of 3NPO <sup>-</sup> with one explicit ethanol molecule                                           | S40 |
| <b>Table S-25.</b> Cartesian coordinates, energy (u.a.) and number of imaginary frequencies (NIMAG) for Transition State (TS2) associated to the departure of 4CNPO <sup>-</sup> with one explicit water molecule and one ethanol molecule         | S42 |
| <b>Table S-26.</b> Cartesian coordinates, energy (u.a.) and number of imaginary frequencies (NIMAG) for Transition State (TS2) associated to the departure of 3NPO <sup>-</sup> with one explicit water molecule and one ethanol molecule          | S44 |
| <b>Table S-27.</b> Cartesian coordinates, energy (u.a.) and number of imaginary frequencies (NIMAG) for Transition State (TS2) associated to the departure of 4CNPO <sup>-</sup> anion for compound <b>1</b> , with two explicit ethanol molecules | S46 |
| <b>Table S-28.</b> Cartesian coordinates, energy (u.a.) and number of imaginary frequencies (NIMAG) for Transition State (TS2) associated to the departure of 3NPO <sup>-</sup> anion for compound <b>1</b> , with two explicit ethanol molecules  | S48 |

**Figure S1.** HPLC analysis of the reaction of **1** with excess of morpholine at wavelength 250 and 300 nm in red and blue, respectively (see experimental). The number are defined in Scheme 2 in the manuscript.

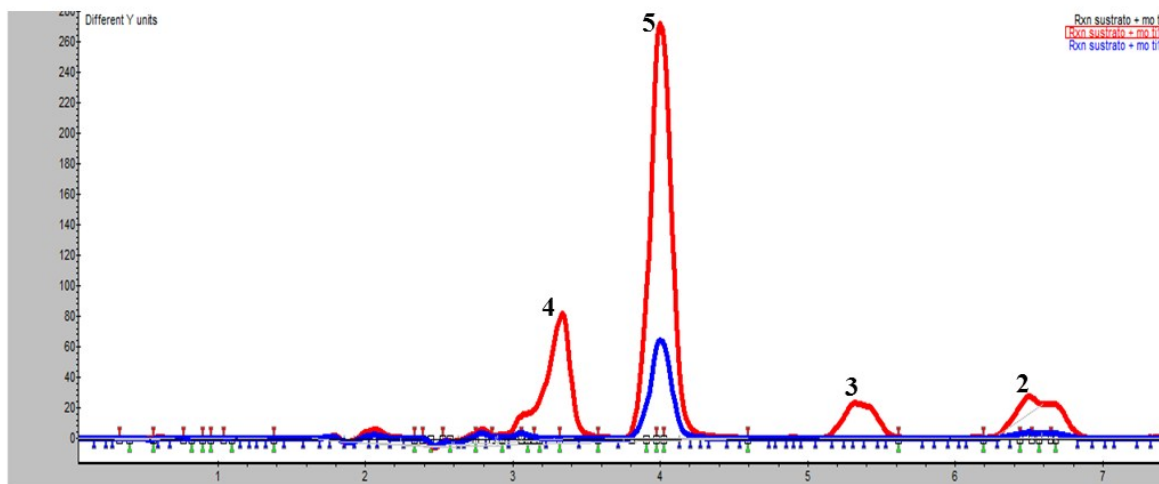

**Table S-1.** Experimental conditions and  $k_{\text{obs}}$  values for the reactions *O*-(3-nitrophenyl) *O*-(4-cyanophenyl) thiocarbonate (**1**) with piperidine, in aqueous ethanol 44wt. %, 25.0 °C,  $\mu = 0.2$  M in KCl.

| pH=10.52<br>$F_N = 0.333$                            |                                     | pH=10.82<br>$F_N = 0.5$                              |                                     |
|------------------------------------------------------|-------------------------------------|------------------------------------------------------|-------------------------------------|
| $10^3 [\text{Amine}]_{\text{tot}}/\text{mol l}^{-1}$ | $10^3 k_{\text{obs}}/\text{s}^{-1}$ | $10^3 [\text{Amine}]_{\text{tot}}/\text{mol l}^{-1}$ | $10^3 k_{\text{obs}}/\text{s}^{-1}$ |
| 1.15                                                 | 5.69                                | 1.15                                                 | 7.74                                |
| 2.31                                                 | 9.71                                | 2.31                                                 | 15.4                                |
| 3.46                                                 | 14.0                                | 3.46                                                 | 25.9                                |
| 4.61                                                 | 18.6                                | 4.61                                                 | 37.3                                |
| 5.77                                                 | 22.8                                | 5.77                                                 | 43.0                                |
| 6.92                                                 | 25.5                                | 6.92                                                 | 50.9                                |
|                                                      |                                     | 8.07                                                 | 57.9                                |
|                                                      |                                     |                                                      |                                     |

**Table S-2.** Experimental conditions and  $k_{\text{obs}}$  values for the reactions *O*-(3-nitrophenyl) *O*-(4-cyanophenyl) thiocarbonate (**1**) with piperazine, in aqueous ethanol 44wt. %, 25.0 °C,  $\mu = 0.2$  M in KCl.

| pH=9.71<br>$F_N = 0.5$                               |                                     | pH=10.01<br>$F_N = 0.666$                            |                                     |
|------------------------------------------------------|-------------------------------------|------------------------------------------------------|-------------------------------------|
| $10^3 [\text{Amine}]_{\text{tot}}/\text{mol l}^{-1}$ | $10^3 k_{\text{obs}}/\text{s}^{-1}$ | $10^3 [\text{Amine}]_{\text{tot}}/\text{mol l}^{-1}$ | $10^3 k_{\text{obs}}/\text{s}^{-1}$ |
| 1.06                                                 | 3.38                                | 1.06                                                 | 5.29                                |
| 2.11                                                 | 9.25                                | 2.11                                                 | 8.27                                |
| 3.17                                                 | 12.6                                | 3.17                                                 | 13.3                                |
| 4.23                                                 | 15.0                                | 4.23                                                 | 24.3                                |
| 5.28                                                 | 21.0                                | 5.28                                                 | 26.8                                |
| 6.34                                                 | 30.2                                | 6.34                                                 | 32.6                                |

**Table S-3.** Experimental conditions and  $k_{\text{obs}}$  values for the reactions *O*-(3-nitrophenyl) *O*-(4-cyanophenyl) thiocarbonate (**1**) with 2-(hydroxyethyl)piperazine, in aqueous ethanol 44wt. %, 25.0 °C,  $\mu = 0.2$  M in KCl.

| pH=9.09<br>$F_N = 0.5$                               |                                     | pH=9.39<br>$F_N = 0.666$                             |                                     |
|------------------------------------------------------|-------------------------------------|------------------------------------------------------|-------------------------------------|
| $10^3 [\text{Amine}]_{\text{tot}}/\text{mol l}^{-1}$ | $10^3 k_{\text{obs}}/\text{s}^{-1}$ | $10^3 [\text{Amine}]_{\text{tot}}/\text{mol l}^{-1}$ | $10^3 k_{\text{obs}}/\text{s}^{-1}$ |
| 1.39                                                 | 1.30                                | 1.20                                                 | 2.00                                |
| 2.77                                                 | 3.20                                | 2.41                                                 | 4.34                                |
| 4.16                                                 | 5.90                                | 3.61                                                 | 8.58                                |
| 5.54                                                 | 8.80                                | 4.82                                                 | 11.6                                |
| 6.93                                                 | 12.2                                | 6.02                                                 | 14.5                                |
| 8.31                                                 | 14.6                                | 7.23                                                 | 16.2                                |
| 9.07                                                 | 17.0                                | 8.43                                                 | 25.4                                |

**Table S-4.** Experimental conditions and  $k_{\text{obs}}$  values for the reactions *O*-(3-nitrophenyl) *O*-(4-cyanophenyl) thiocarbonate (**1**) with morpholine, in aqueous ethanol 44wt. %, 25.0 °C,  $\mu = 0.2$  M in KCl.

| pH=8.48<br>$F_N = 0.5$                               |                                     | pH=8.78<br>$F_N = 0.666$                             |                                     |
|------------------------------------------------------|-------------------------------------|------------------------------------------------------|-------------------------------------|
| $10^3 [\text{Amine}]_{\text{tot}}/\text{mol l}^{-1}$ | $10^3 k_{\text{obs}}/\text{s}^{-1}$ | $10^3 [\text{Amine}]_{\text{tot}}/\text{mol l}^{-1}$ | $10^3 k_{\text{obs}}/\text{s}^{-1}$ |
| 0.596                                                | 0.488                               | 0.596                                                | 0.645                               |
| 1.19                                                 | 0.988                               | 1.19                                                 | 1.30                                |
| 2.38                                                 | 2.28                                | 2.38                                                 | 3.30                                |
| 3.57                                                 | 3.74                                | 3.57                                                 | 4.98                                |
| 4.77                                                 | 5.38                                | 4.77                                                 | 7.71                                |
| 5.36                                                 | 7.83                                | 5.36                                                 | 7.50                                |
| 5.96                                                 | 9.04                                | 5.96                                                 | 8.98                                |
| 8.34                                                 | 11.5                                | 8.34                                                 | 12.6                                |
| 10.7                                                 | 14.9                                | 10.7                                                 | 18.5                                |

**Table S-5.** Experimental conditions and  $k_{\text{obs}}$  values for the reactions *O*-(3-nitrophenyl) *O*-(4-cyanophenyl) thiocarbonate (**1**) with N-formylpiperazine, in aqueous ethanol 44wt. %, 25.0 °C,  $\mu = 0.2$  M in KCl.

| pH= 7.33<br>$F_N=0.333$                              |                                     | pH=7.63<br>$F_N=0.5$                                 |                                     |
|------------------------------------------------------|-------------------------------------|------------------------------------------------------|-------------------------------------|
| $10^2 [\text{Amine}]_{\text{tot}}/\text{mol l}^{-1}$ | $10^3 k_{\text{obs}}/\text{s}^{-1}$ | $10^2 [\text{Amine}]_{\text{tot}}/\text{mol l}^{-1}$ | $10^3 k_{\text{obs}}/\text{s}^{-1}$ |
| 0.0792                                               | 0.0520                              | 0.080                                                | 0.0387                              |
| 0.198                                                | 0.100                               | 0.200                                                | 0.140                               |
| 0.317                                                | 0.169                               | 0.292                                                | 0.692                               |
| 0.429                                                | 0.707                               | 0.320                                                | 0.325                               |
| 0.554                                                | 0.326                               | 0.440                                                | 0.539                               |
| 0.673                                                | 0.510                               | 0.560                                                | 0.827                               |
| 0.792                                                | 0.884                               | 0.584                                                | 1.83                                |
| 0.861                                                | 1.51                                | 0.876                                                | 3.10                                |
| 1.29                                                 | 2.69                                | 1.17                                                 | 4.16                                |
| 1.72                                                 | 3.97                                | 1.46                                                 | 6.83                                |
| 2.15                                                 | 5.82                                | 1.75                                                 | 8.97                                |
| 2.58                                                 | 8.00                                | 3.04                                                 | 16.2                                |
| 6.09                                                 | 22.0                                | 4.06                                                 | 22.7                                |
| 7.62                                                 | 32.5                                | 5.08                                                 | 30.6                                |

**Table S-6.** Experimental conditions and  $k_{\text{obs}}$  values for the reactions *O*-(3-nitrophenyl) *O*-(4-cyanophenyl) thiocarbonate (**1**) with phenylendiamine, in aqueous ethanol 44wt. %, 25.0 °C,  $\mu = 0.2$  M in KCl, borate buffer 0.07M.

| pH= 8.4                                              |                                     | pH=9.8                                               |                                     |
|------------------------------------------------------|-------------------------------------|------------------------------------------------------|-------------------------------------|
| $10^3 [\text{Amine}]_{\text{tot}}/\text{mol l}^{-1}$ | $10^3 k_{\text{obs}}/\text{s}^{-1}$ | $10^3 [\text{Amine}]_{\text{tot}}/\text{mol l}^{-1}$ | $10^3 k_{\text{obs}}/\text{s}^{-1}$ |
| 1.60                                                 | 2.11                                | 1.60                                                 | 2.85                                |
| 3.00                                                 | 3.87                                | 3.00                                                 | 4.70                                |
| 6.00                                                 | 8.04                                | 6.00                                                 | 9.76                                |
| 9.50                                                 | 14.4                                | 9.50                                                 | 15.2                                |
| 16.0                                                 | 13.5                                | 11.0                                                 | 20.4                                |
|                                                      |                                     | 13.5                                                 | 23.9                                |
|                                                      |                                     | 16.0                                                 | 27.5                                |

**Table S-7.** Experimental conditions and  $k_{\text{obs}}$  values for the reactions *O*-(3-nitrophenyl) *O*-(4-cyanophenyl) thiocarbonate (**1**) with 4-methoxyaniline, in aqueous ethanol 44wt. %, 25.0 °C,  $\mu = 0.2$  M in KCl, borate buffer 0.07M.

| pH= 8.4                                              |                                     | pH=9.8                                               |                                     |
|------------------------------------------------------|-------------------------------------|------------------------------------------------------|-------------------------------------|
| $10^3 [\text{Amine}]_{\text{tot}}/\text{mol l}^{-1}$ | $10^3 k_{\text{obs}}/\text{s}^{-1}$ | $10^3 [\text{Amine}]_{\text{tot}}/\text{mol l}^{-1}$ | $10^3 k_{\text{obs}}/\text{s}^{-1}$ |
| 1.60                                                 | 0.583                               | 1.60                                                 | 0.599                               |
| 3.00                                                 | 1.06                                | 3.00                                                 | 1.08                                |
| 6.00                                                 | 2.14                                | 6.00                                                 | 2.16                                |
| 9.50                                                 | 3.41                                | 9.50                                                 | 3.94                                |
| 11.0                                                 | 3.94                                | 11.0                                                 | 4.17                                |
| 13.5                                                 | 4.80                                | 13.5                                                 | 5.09                                |
| 16.0                                                 | 6.13                                | 16.0                                                 | 6.83                                |

**Table S-8.** Experimental conditions and  $k_{\text{obs}}$  values for the reactions *O*-(3-nitrophenyl) *O*-(4-cyanophenyl) thiocarbonate (**1**) with 4-methylaniline, in aqueous ethanol 44wt. %, 25.0 °C,  $\mu = 0.2$  M in KCl, borate buffer 0.07M.

| pH= 8.4                                              |                                     | pH=9.8                                               |                                     |
|------------------------------------------------------|-------------------------------------|------------------------------------------------------|-------------------------------------|
| $10^3 [\text{Amine}]_{\text{tot}}/\text{mol l}^{-1}$ | $10^3 k_{\text{obs}}/\text{s}^{-1}$ | $10^3 [\text{Amine}]_{\text{tot}}/\text{mol l}^{-1}$ | $10^3 k_{\text{obs}}/\text{s}^{-1}$ |
| 1.60                                                 | 0.496                               | 1.60                                                 | 0.508                               |
| 3.00                                                 | 0.728                               | 3.00                                                 | 0.725                               |
| 6.00                                                 | 1.35                                | 6.00                                                 | 1.33                                |
| 9.50                                                 | 2.20                                | 9.50                                                 | 2.11                                |
|                                                      |                                     | 11.0                                                 | 2.72                                |
|                                                      |                                     | 13.5                                                 | 3.12                                |
|                                                      |                                     | 16.0                                                 | 3.60                                |



**Table S-9.** Experimental conditions and  $k_{\text{obs}}$  values for the reactions *O*-(3-nitrophenyl) *O*-(4-cyanophenyl) thiocarbonate (**1**) with aniline, in aqueous ethanol 44wt. %, 25.0 °C,  $\mu = 0.2$  M in KCl, borate buffer 0.07M.

| pH= 8.4                                              |                                     | pH=9.8                                               |                                     |
|------------------------------------------------------|-------------------------------------|------------------------------------------------------|-------------------------------------|
| $10^3 [\text{Amine}]_{\text{tot}}/\text{mol l}^{-1}$ | $10^3 k_{\text{obs}}/\text{s}^{-1}$ | $10^3 [\text{Amine}]_{\text{tot}}/\text{mol l}^{-1}$ | $10^3 k_{\text{obs}}/\text{s}^{-1}$ |
| 3.00                                                 | 0.318                               | 1.60                                                 | 0.134                               |
| 6.00                                                 | 0.573                               | 3.00                                                 | 0.271                               |
| 9.50                                                 | 0.824                               | 6.00                                                 | 0.506                               |
| 11.0                                                 | 0.881                               | 9.50                                                 | 0.787                               |
| 13.5                                                 | 1.15                                | 11.0                                                 | 0.932                               |
| 16.0                                                 | 1.19                                | 13.5                                                 | 1.15                                |
| 35.0                                                 | 2.63                                | 16.0                                                 | 1.35                                |

**Table S-10.** Experimental conditions and  $k_{\text{obs}}$  values for the reactions *O*-(3-nitrophenyl) *O*-(4-cyanophenyl) thiocarbonate (**1**) with 3-amino acetophenone, in aqueous ethanol 44wt. %, 25.0 °C,  $\mu = 0.2$  M in KCl, borate buffer 0.07M.

| pH= 8.4                                              |                                     | pH=9.8                                               |                                     |
|------------------------------------------------------|-------------------------------------|------------------------------------------------------|-------------------------------------|
| $10^2 [\text{Amine}]_{\text{tot}}/\text{mol l}^{-1}$ | $10^4 k_{\text{obs}}/\text{s}^{-1}$ | $10^2 [\text{Amine}]_{\text{tot}}/\text{mol l}^{-1}$ | $10^4 k_{\text{obs}}/\text{s}^{-1}$ |
| 0.95                                                 | 2.67                                | 0.95                                                 | 2.42                                |
| 1.10                                                 | 2.76                                | 1.10                                                 | 2.73                                |
| 1.35                                                 | 2.70                                | 1.35                                                 | 3.02                                |
| 1.60                                                 | 3.06                                | 1.60                                                 | 3.18                                |
| 2.00                                                 | 4.20                                | 2.00                                                 | 3.84                                |
|                                                      |                                     | 2.50                                                 | 4.69                                |

### Estimation of $pK_a$ of $T^\pm$

The  $pK_a$  of intermediate  $T^\pm$  can be estimated by Jencks' method (eqn. 1),<sup>1</sup> where  $\sigma_I$  and  $\sigma_I(\text{ref})$  are the Hammett inductive substituent constants of the varying group and of the reference, respectively. The Hammett inductive equilibrium constant ( $\rho_I$ ) for the  $pK_a$  of the tetrahedral intermediates has been estimated as  $\rho_I = -9.2$ .<sup>2</sup>

$$pK_a - pK_a(\text{ref}) = \rho_I (\sigma_I - \sigma_I(\text{ref})) \quad (1)$$

We consider as reference the reaction of 4-methylphenyl 3-nitrophenyl thionocarbonate with SAA, in which the  $pK_a$  of the tetrahedral intermediate formed was estimated as 7.1 units lower than that of the respective amine.<sup>3</sup> Substitution of 4-methylphenyl in this intermediate by 4-cyanophenyl yields the intermediate  $T^\pm$  in Scheme S1.

To our knowledge, the  $\sigma_I$  value for 4-cyanophenoxy has not been reported. In view of the greater electron-withdrawing effect of the 4-cyano group compared to that of 4-methyl, we can assume  $(\sigma_I - \sigma_I(\text{ref})) > 0$  in eqn 1, and considering  $pK_a(\text{ref}) = 7.1$  and  $\rho_I = -9.2$ , a  $pK_a$  value of intermediate  $T^\pm$  can be estimated as more than 7.1 units lower than that of the corresponding conjugate acid of the amine.

1. Sayer, J. M.; Jencks, W. P. *J. Am. Chem. Soc.* **1973**, *95*, 5637-5649. Fox, J. P.; Jencks, W. P. *J. Am. Chem. Soc.* **1974**, *96*, 1436-1449.
2. Taylor, P. J. *J. Chem. Soc., Perkin Trans. 2* 1993, 1423-1427.
3. E. A. Castro, P. Garcia, L. Leandro, N. Quesieh, A. Rebolledo, J. G. Santos. *J. Org. Chem.* **2000**, *65*, 9047-9053.

**Figure S2.** Corrected Bronsted plot for the reactions of **1** with SA amines. The  $k_1$  values, as well as those of the  $pK_a$  of the conjugate acids of these amines, were statistically corrected with  $q = 2$  for piperazine ( $q = 1$  for all the other SA amines) and  $p = 2$  for all the conjugate acids of the amines.

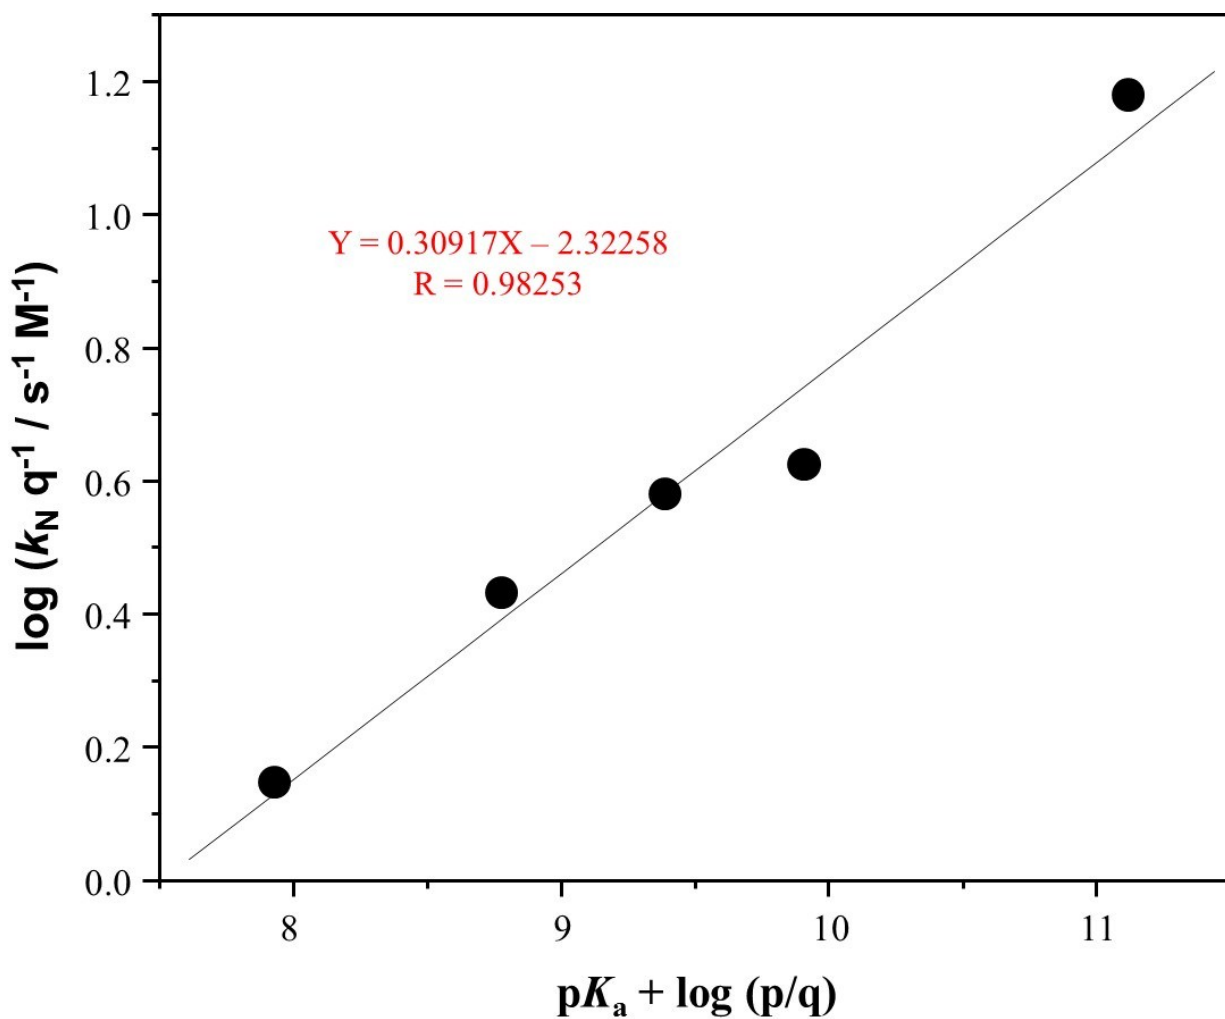

**Figure S3.** Corrected Bronsted plot for the reactions of **1** with anilines. The  $k_N$  values, as well as those of the  $pK_a$  of the conjugate acids of these anilines, were statistically corrected with  $q = 2$  for 4-phenyldiamine ( $q = 1$  for all the other anilines) and  $p = 3$  for all the conjugate acids of the anilines.

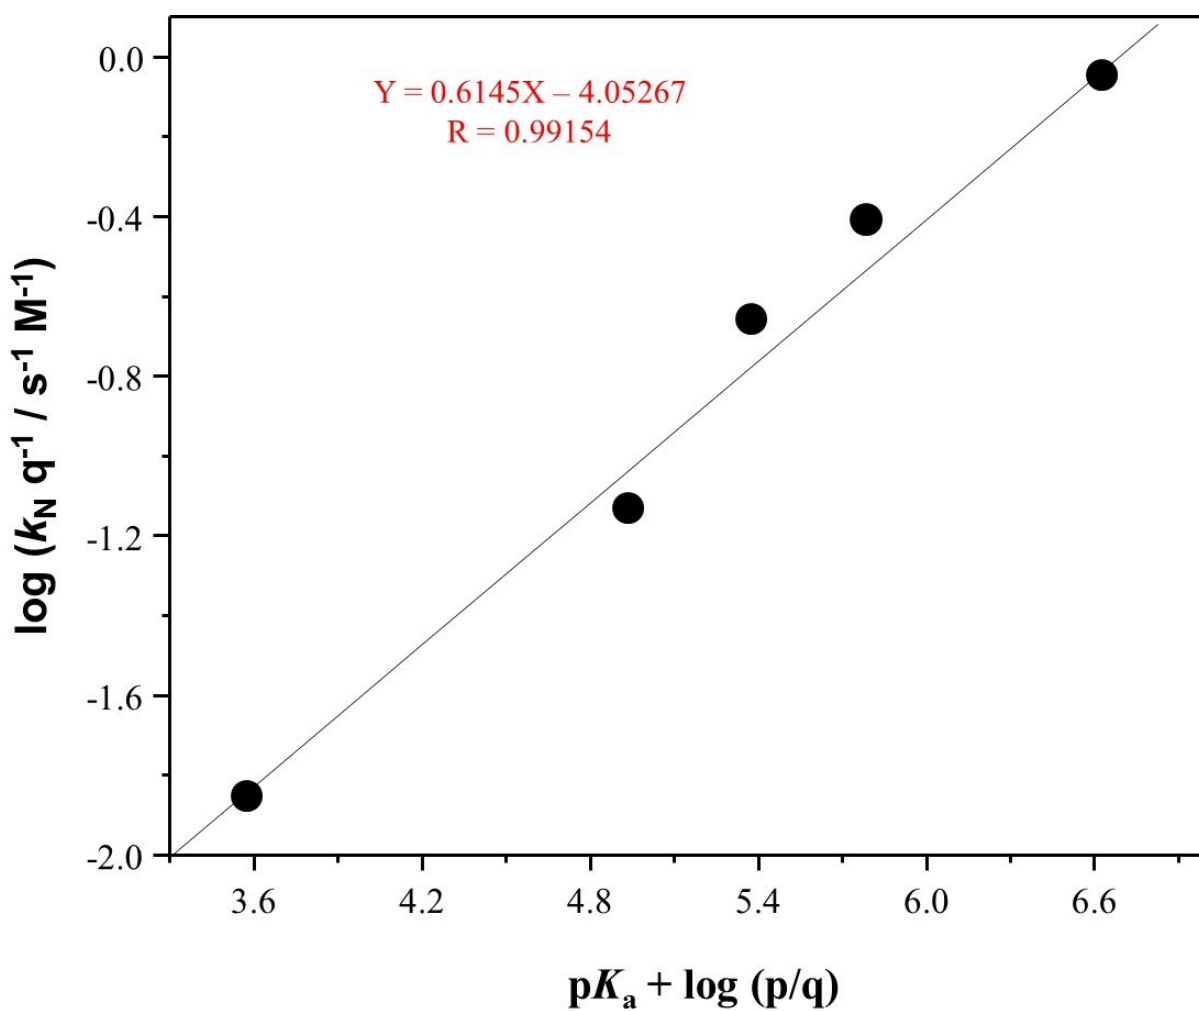

**Table S-11.** Experimental conditions and  $k_{\text{obs}}$  values for the reactions *O*-(3-nitrophenyl) *O*-(4-cyanophenyl) thiocarbonate (**1**) with aniline, in aqueous ethanol 44wt. %, 25.0 °C,  $\mu = 0.2$  M in KCl, borate buffer 0.14 and 0.21M.

| $10^2[\text{aniline}]/\text{mol l}^{-1}$ | $k_{\text{obs}}/\text{s}^{-1}$   |                                  |
|------------------------------------------|----------------------------------|----------------------------------|
|                                          | [Buffer]=0.14mol l <sup>-1</sup> | [Buffer]=0.21mol l <sup>-1</sup> |
| 0.950                                    | 1.27                             | 2.05                             |
| 1.10                                     | 1.55                             | 1.96                             |
| 1.35                                     | 1.84                             | 2.50                             |
| 1.60                                     | 2.14                             | 2.64                             |
| 2.50                                     | 3.38                             | 4.08                             |
| 3.50                                     | 4.28                             | 5.70                             |
| 4.50                                     | 5.05                             | 7.15                             |

**Figure S4.** Dependence of  $k_N$  values with buffer concentration.

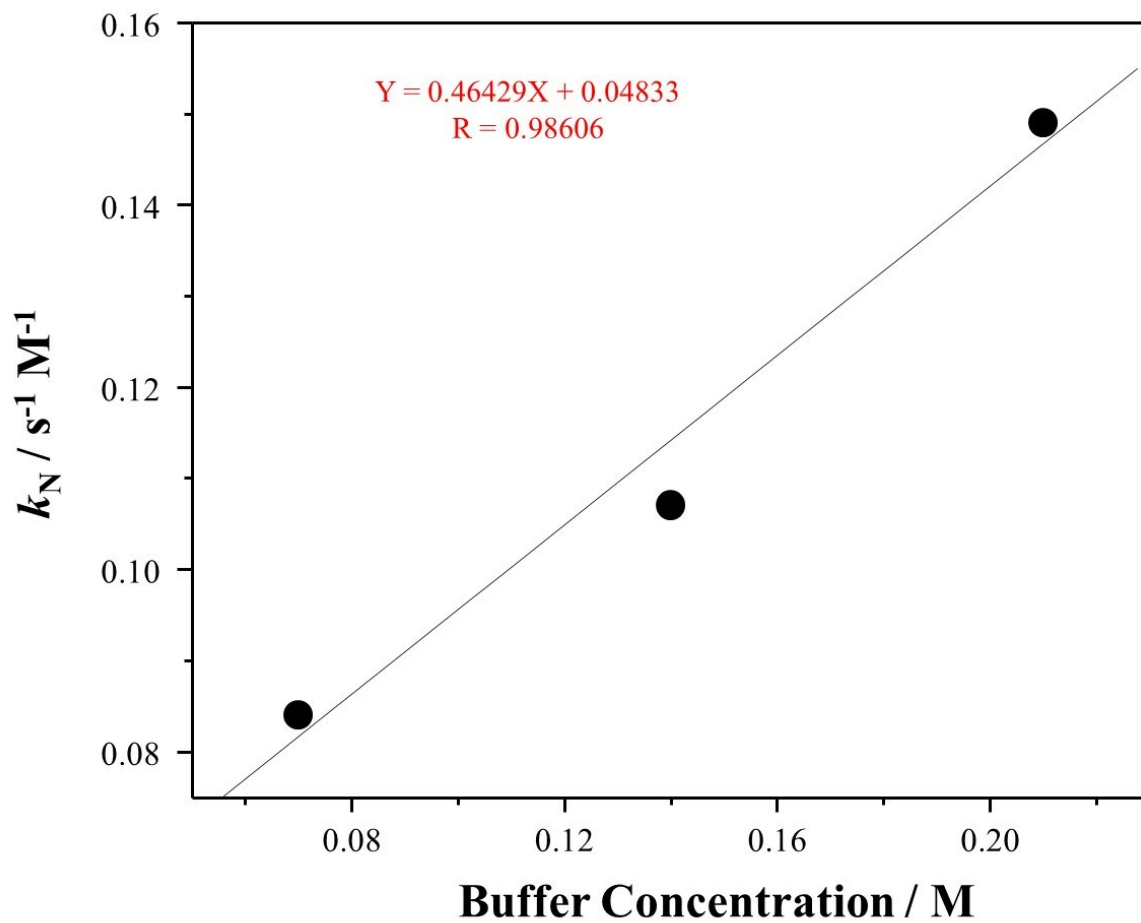

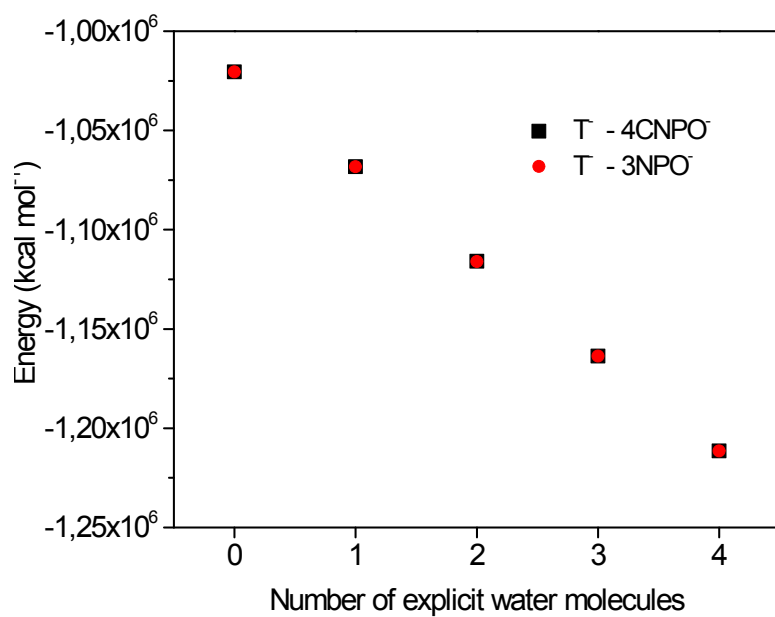

**Figure S5.** Energy profile, of systems containing T<sup>-</sup>, as a function of the explicit water molecules included.

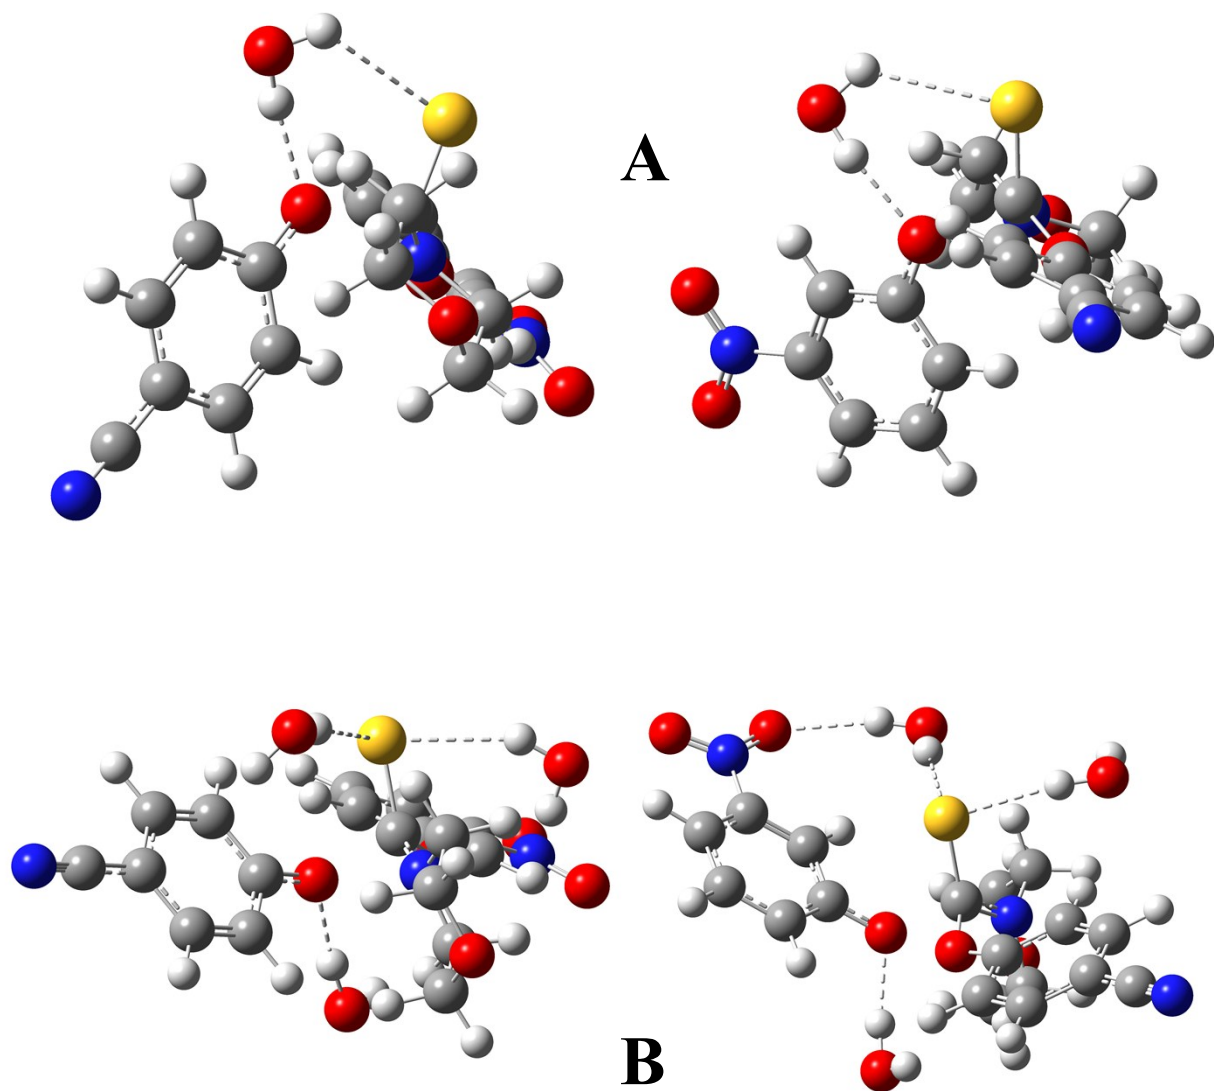

**Figure S6.** Structure of the TS2 for the departure of 4-CNPO<sup>-</sup> and 3-NPO<sup>-</sup> with a) assistance of one explicit water molecule, b) assistance of three explicit water assistance water molecules.



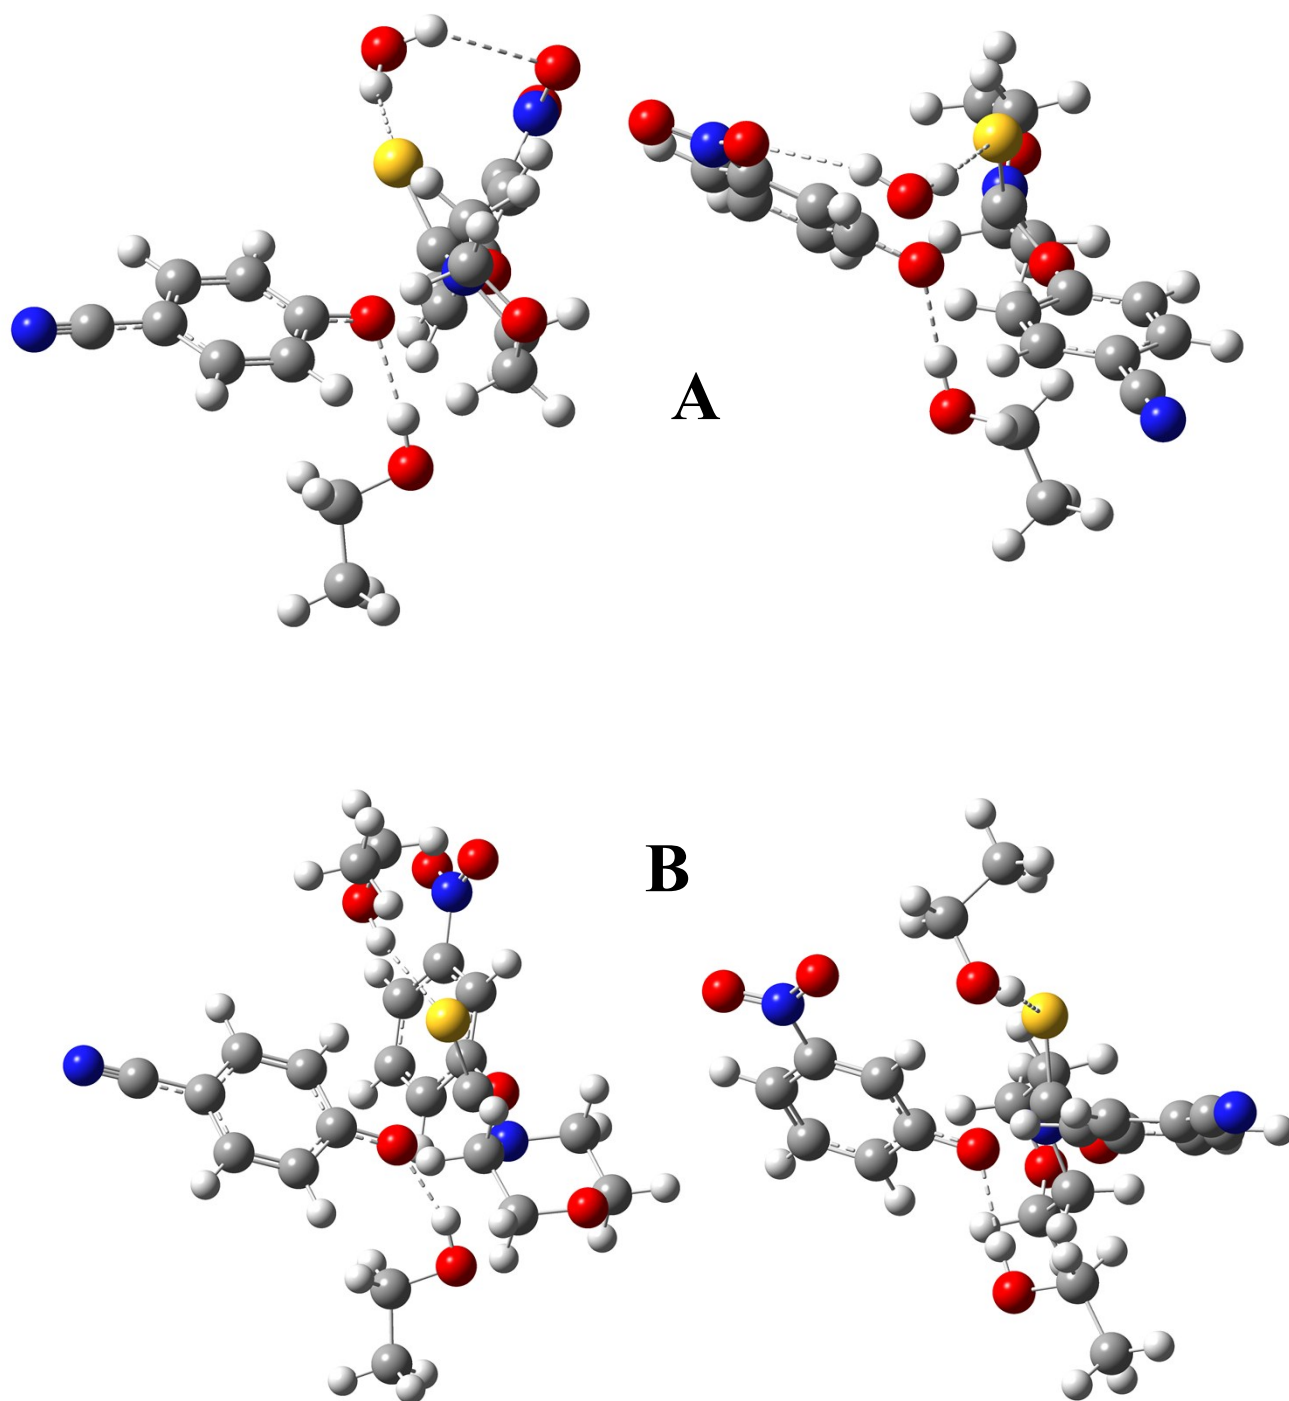

**Figure S7.** Structure of the TS2 for the departure of 4-CNPO<sup>-</sup> (left) and 3-NPO<sup>-</sup> (right) with a) the assistance of one explicit water molecule and one explicit ethanol molecule, b) the assistance of two explicit ethanol molecules

**Table S12.** Energy gap (kcal mol<sup>-1</sup>) of TS2 as a function of the number of assisting water and ethanol molecules.

|                     | Departure          | 0    | 1     | 2     | 3    |          | 1W+1Eth* |
|---------------------|--------------------|------|-------|-------|------|----------|----------|
| Implicit<br>water   | 4CNPO <sup>-</sup> | 1.98 | 4.58  | 12.64 | 4.79 | Implicit | 7.87     |
|                     | 3NPO <sup>-</sup>  | 1.27 | 4.12  | 12.94 | 5.58 | Water    | 7.75     |
| Explicit<br>Ethanol | 4CNPO <sup>-</sup> | ---  | 16.24 | 13.34 | ---  | Implicit | 7.93     |
|                     | 3NPO <sup>-</sup>  | ---  | 10.09 | 7.64  | ---  | ethanol  | 13.24    |

\*1W+1Eth= one explicit water molecule and one explicit ethanol molecule

**Table S-13.** Cartesian coordinates, energy (u.a.) and number of imaginary frequencies (NIMAG) for Transition State (TS2) associated to the departure of 4-CNPO<sup>-</sup> anion for compound **1** without explicit water molecules, calculated using WB97XD/6-311++G(d,p) level theory

| Center<br>Number | Atomic<br>Number | Coordinates (Angstroms) |           |           |
|------------------|------------------|-------------------------|-----------|-----------|
|                  |                  | X                       | Y         | Z         |
| 1                | 6                | 0.002430                | 1.203353  | 0.551256  |
| 2                | 16               | -0.300169               | 0.420769  | 2.052532  |
| 3                | 8                | -0.154769               | 0.081758  | -0.848898 |
| 4                | 8                | 1.322155                | 1.572052  | 0.235506  |
| 5                | 6                | -0.764395               | -1.077473 | -0.801306 |
| 6                | 6                | -2.022533               | -1.275255 | -0.200520 |
| 7                | 6                | -0.154013               | -2.193116 | -1.409619 |
| 8                | 6                | -2.604330               | -2.530589 | -0.242903 |
| 9                | 1                | -2.529517               | -0.462497 | 0.294351  |
| 10               | 6                | -0.770559               | -3.435516 | -1.439687 |
| 11               | 1                | 0.820338                | -2.044034 | -1.862030 |
| 12               | 6                | -2.011475               | -3.631525 | -0.848020 |
| 13               | 1                | -0.274197               | -4.268902 | -1.925913 |
| 14               | 1                | -2.508792               | -4.590639 | -0.847485 |
| 15               | 6                | 2.378172                | 0.741475  | 0.238647  |
| 16               | 6                | 3.595384                | 1.372163  | -0.045620 |
| 17               | 6                | 2.354219                | -0.635971 | 0.477586  |
| 18               | 6                | 4.769160                | 0.648623  | -0.106339 |
| 19               | 1                | 3.591057                | 2.441542  | -0.218788 |

|    |   |           |           |           |
|----|---|-----------|-----------|-----------|
| 20 | 6 | 3.533475  | -1.356065 | 0.414050  |
| 21 | 1 | 1.428294  | -1.127385 | 0.728827  |
| 22 | 6 | 4.749514  | -0.731056 | 0.121382  |
| 23 | 1 | 5.706156  | 1.145813  | -0.328788 |
| 24 | 1 | 3.511596  | -2.424225 | 0.597192  |
| 25 | 7 | -3.929986 | -2.704642 | 0.374797  |
| 26 | 8 | -4.383439 | -3.835777 | 0.449091  |
| 27 | 8 | -4.515911 | -1.716928 | 0.776453  |
| 28 | 6 | 5.960591  | -1.488048 | 0.057454  |
| 29 | 7 | 6.941685  | -2.093389 | 0.002767  |
| 30 | 6 | -2.687542 | 3.746537  | 0.438212  |
| 31 | 6 | -2.185552 | 2.315074  | 0.518145  |
| 32 | 6 | -0.589587 | 2.832985  | -1.187020 |
| 33 | 6 | -1.133049 | 4.252368  | -1.223830 |
| 34 | 1 | -2.292900 | 1.928154  | 1.531251  |
| 35 | 1 | -2.780017 | 1.685497  | -0.164036 |
| 36 | 1 | -2.164547 | 4.356377  | 1.190451  |
| 37 | 1 | -3.760979 | 3.784502  | 0.633259  |
| 38 | 1 | 0.471086  | 2.838015  | -1.431102 |
| 39 | 1 | -1.109605 | 2.208799  | -1.927011 |
| 40 | 1 | -1.074032 | 4.656332  | -2.237062 |
| 41 | 1 | -0.535547 | 4.888778  | -0.552362 |
| 42 | 7 | -0.782888 | 2.285925  | 0.150195  |
| 43 | 8 | -2.495142 | 4.309962  | -0.848000 |

---

Total Energy (a.u.) = -1633.954009; **NIMAG = i252.36**

**Table S-14.** Cartesian coordinates, energy (u.a.) and number of imaginary frequencies (NIMAG) for Transition State (TS2) associated to the departure of 3-NPO<sup>-</sup> anion for compound **1**, without explicit water molecules, calculated using WB97XD/6-311++G(d,p) level theory

| Center Number | Atomic Number | Coordinates (Angstroms) |           |           |
|---------------|---------------|-------------------------|-----------|-----------|
|               |               | X                       | Y         | Z         |
| 1             | 6             | 0.002430                | 1.203353  | 0.551256  |
| 2             | 16            | -0.300169               | 0.420769  | 2.052532  |
| 3             | 8             | -0.154769               | 0.081758  | -0.848898 |
| 4             | 8             | 1.322155                | 1.572052  | 0.235506  |
| 5             | 6             | -0.764395               | -1.077473 | -0.801306 |
| 6             | 6             | -2.022533               | -1.275255 | -0.200520 |
| 7             | 6             | -0.154013               | -2.193116 | -1.409619 |
| 8             | 6             | -2.604330               | -2.530589 | -0.242903 |
| 9             | 1             | -2.529517               | -0.462497 | 0.294351  |
| 10            | 6             | -0.770559               | -3.435516 | -1.439687 |
| 11            | 1             | 0.820338                | -2.044034 | -1.862030 |
| 12            | 6             | -2.011475               | -3.631525 | -0.848020 |
| 13            | 1             | -0.274197               | -4.268902 | -1.925913 |
| 14            | 1             | -2.508792               | -4.590639 | -0.847485 |
| 15            | 6             | 2.378172                | 0.741475  | 0.238647  |
| 16            | 6             | 3.595384                | 1.372163  | -0.045620 |
| 17            | 6             | 2.354219                | -0.635971 | 0.477586  |
| 18            | 6             | 4.769160                | 0.648623  | -0.106339 |
| 19            | 1             | 3.591057                | 2.441542  | -0.218788 |
| 20            | 6             | 3.533475                | -1.356065 | 0.414050  |
| 21            | 1             | 1.428294                | -1.127385 | 0.728827  |
| 22            | 6             | 4.749514                | -0.731056 | 0.121382  |
| 23            | 1             | 5.706156                | 1.145813  | -0.328788 |
| 24            | 1             | 3.511596                | -2.424225 | 0.597192  |
| 25            | 7             | -3.929986               | -2.704642 | 0.374797  |
| 26            | 8             | -4.383439               | -3.835777 | 0.449091  |
| 27            | 8             | -4.515911               | -1.716928 | 0.776453  |
| 28            | 6             | 5.960591                | -1.488048 | 0.057454  |
| 29            | 7             | 6.941685                | -2.093389 | 0.002767  |
| 30            | 6             | -2.687542               | 3.746537  | 0.438212  |
| 31            | 6             | -2.185552               | 2.315074  | 0.518145  |
| 32            | 6             | -0.589587               | 2.832985  | -1.187020 |
| 33            | 6             | -1.133049               | 4.252368  | -1.223830 |
| 34            | 1             | -2.292900               | 1.928154  | 1.531251  |
| 35            | 1             | -2.780017               | 1.685497  | -0.164036 |
| 36            | 1             | -2.164547               | 4.356377  | 1.190451  |
| 37            | 1             | -3.760979               | 3.784502  | 0.633259  |
| 38            | 1             | 0.471086                | 2.838015  | -1.431102 |
| 39            | 1             | -1.109605               | 2.208799  | -1.927011 |

|    |   |           |          |           |
|----|---|-----------|----------|-----------|
| 40 | 1 | -1.074032 | 4.656332 | -2.237062 |
| 41 | 1 | -0.535547 | 4.888778 | -0.552362 |
| 42 | 7 | -0.782888 | 2.285925 | 0.150195  |
| 43 | 8 | -2.495142 | 4.309962 | -0.848000 |

---

Total Energy (a.u.) = -1633.954455; **NIMAG = i232.51**

**Table S-15.** Cartesian coordinates, energy (u.a.) and number of imaginary frequencies (NIMAG) for Transition State (TS2) associated to the departure of 4-CNPO<sup>-</sup> anion for compound **1**, with one water molecule, calculated using WB97XD/6-311++G(d,p) level theory

| Center Number | Atomic Number | Coordinates (Angstroms) |           |           |
|---------------|---------------|-------------------------|-----------|-----------|
|               |               | X                       | Y         | Z         |
| 1             | 6             | 0.078839                | -1.284984 | 0.145490  |
| 2             | 16            | 0.709345                | -2.654602 | 0.988579  |
| 3             | 8             | 0.985792                | -0.397467 | -0.439608 |
| 4             | 8             | -0.679335               | -0.264645 | 1.381745  |
| 5             | 6             | 2.131190                | -0.015428 | 0.180652  |
| 6             | 6             | 3.183110                | 0.308346  | -0.665247 |
| 7             | 6             | 2.265419                | 0.135419  | 1.561519  |
| 8             | 6             | 4.360100                | 0.786777  | -0.109975 |
| 9             | 1             | 3.083433                | 0.184742  | -1.734239 |
| 10            | 6             | 3.463324                | 0.608587  | 2.080649  |
| 11            | 1             | 1.434687                | -0.114162 | 2.204468  |
| 12            | 6             | 4.529365                | 0.942430  | 1.256986  |
| 13            | 1             | 3.563502                | 0.722380  | 3.153619  |
| 14            | 1             | 5.464324                | 1.315972  | 1.650045  |
| 15            | 6             | -1.587631               | 0.616052  | 0.993205  |
| 16            | 6             | -1.379670               | 1.510200  | -0.075494 |
| 17            | 6             | -2.822952               | 0.663172  | 1.668708  |
| 18            | 6             | -2.362731               | 2.405365  | -0.447867 |
| 19            | 1             | -0.437278               | 1.479999  | -0.604708 |
| 20            | 6             | -3.801286               | 1.564715  | 1.299108  |
| 21            | 1             | -2.995715               | -0.037525 | 2.477956  |
| 22            | 6             | -3.586165               | 2.445192  | 0.231924  |
| 23            | 1             | -2.188974               | 3.089043  | -1.271665 |
| 24            | 1             | -4.747644               | 1.587193  | 1.828074  |
| 25            | 7             | 5.468255                | 1.136627  | -1.009135 |
| 26            | 8             | 5.287243                | 1.036629  | -2.208893 |
| 27            | 8             | 6.513663                | 1.512695  | -0.508373 |
| 28            | 6             | -4.599056               | 3.374492  | -0.156423 |
| 29            | 7             | -5.417175               | 4.126610  | -0.469634 |
| 30            | 6             | -1.973975               | -1.198954 | -2.959668 |
| 31            | 6             | -0.701323               | -1.516103 | -2.187741 |
| 32            | 6             | -2.073779               | -2.281048 | -0.365632 |
| 33            | 6             | -3.301628               | -1.923327 | -1.186464 |
| 34            | 1             | -0.352652               | -2.532862 | -2.434709 |
| 35            | 1             | 0.074783                | -0.805887 | -2.467291 |
| 36            | 1             | -2.241485               | -0.145123 | -2.788099 |
| 37            | 1             | -1.819897               | -1.359439 | -4.029134 |
| 38            | 1             | -1.803772               | -3.336555 | -0.516456 |

|    |   |           |           |           |
|----|---|-----------|-----------|-----------|
| 39 | 1 | -2.279784 | -2.137635 | 0.696210  |
| 40 | 1 | -4.120676 | -2.610493 | -0.966587 |
| 41 | 1 | -3.618134 | -0.897732 | -0.944800 |
| 42 | 7 | -0.985072 | -1.405230 | -0.766295 |
| 43 | 8 | -3.048761 | -2.032616 | -2.578066 |
| 44 | 8 | -1.608312 | -2.054206 | 3.377991  |
| 45 | 1 | -1.227459 | -1.361611 | 2.812773  |
| 46 | 1 | -1.128070 | -2.821236 | 3.051979  |

---

Total Energy (a.u.) = -1702.439389; **NIMAG = i269.25**

**Table S-16.** Cartesian coordinates, energy (u.a.) and number of imaginary frequencies (NIMAG) for Transition State (TS2) associated to the departure of 3-NPO<sup>-</sup> anion for compound **1**, with one explicit water molecule, calculated using WB97XD/6-311++G(d,p) level theory

| Center Number | Atomic Number | Coordinates (Angstroms) |           |           |
|---------------|---------------|-------------------------|-----------|-----------|
|               |               | X                       | Y         | Z         |
| 1             | 6             | 0.566790                | 1.195312  | 0.538019  |
| 2             | 16            | 1.210444                | 1.739397  | 2.040718  |
| 3             | 8             | -0.071394               | -0.459244 | 0.840782  |
| 4             | 8             | 1.458394                | 0.957804  | -0.512442 |
| 5             | 6             | -0.978500               | -0.917026 | -0.008934 |
| 6             | 6             | -2.202517               | -1.401684 | 0.482582  |
| 7             | 6             | -0.778363               | -0.924611 | -1.401510 |
| 8             | 6             | -3.152243               | -1.873912 | -0.408346 |
| 9             | 1             | -2.399684               | -1.390597 | 1.547369  |
| 10            | 6             | -1.758703               | -1.392323 | -2.264524 |
| 11            | 1             | 0.158040                | -0.547865 | -1.790874 |
| 12            | 6             | -2.966995               | -1.878473 | -1.784453 |
| 13            | 1             | -1.576780               | -1.382390 | -3.334015 |
| 14            | 1             | -3.740560               | -2.251743 | -2.439778 |
| 15            | 6             | 2.630113                | 0.298329  | -0.353889 |
| 16            | 6             | 3.609402                | 0.603059  | -1.299515 |
| 17            | 6             | 2.866022                | -0.678150 | 0.615135  |
| 18            | 6             | 4.823070                | -0.058958 | -1.286659 |
| 19            | 1             | 3.400544                | 1.370125  | -2.035175 |
| 20            | 6             | 4.083859                | -1.334218 | 0.626425  |
| 21            | 1             | 2.099901                | -0.912644 | 1.337586  |
| 22            | 6             | 5.070592                | -1.034897 | -0.318113 |
| 23            | 1             | 5.583937                | 0.180565  | -2.019992 |
| 24            | 1             | 4.274067                | -2.092784 | 1.376415  |
| 25            | 7             | -4.429242               | -2.382193 | 0.125649  |
| 26            | 8             | -4.589551               | -2.385163 | 1.330290  |
| 27            | 8             | -5.265647               | -2.774693 | -0.671774 |
| 28            | 6             | 6.324852                | -1.723573 | -0.299882 |
| 29            | 7             | 7.337200                | -2.276615 | -0.292963 |
| 30            | 6             | -2.925162               | 2.292600  | 0.087983  |
| 31            | 6             | -1.635558               | 2.148523  | 0.878298  |
| 32            | 6             | -0.417816               | 2.757775  | -1.109957 |
| 33            | 6             | -1.751337               | 2.896174  | -1.830328 |
| 34            | 1             | -1.398765               | 3.085992  | 1.402404  |
| 35            | 1             | -1.745513               | 1.365479  | 1.630294  |
| 36            | 1             | -3.206031               | 1.318872  | -0.339728 |
| 37            | 1             | -3.730984               | 2.642204  | 0.735424  |
| 38            | 1             | -0.105767               | 3.734913  | -0.704232 |



|    |   |           |           |           |
|----|---|-----------|-----------|-----------|
| 39 | 1 | 0.337493  | 2.418460  | -1.816387 |
| 40 | 1 | -1.695967 | 3.685629  | -2.583606 |
| 41 | 1 | -1.989107 | 1.942018  | -2.325601 |
| 42 | 7 | -0.567510 | 1.786823  | -0.039107 |
| 43 | 8 | -2.797140 | 3.251085  | -0.950520 |
| 44 | 8 | -0.914330 | -0.411755 | 3.535978  |
| 45 | 1 | -0.560455 | -0.568784 | 2.644509  |
| 46 | 1 | -0.462306 | 0.408148  | 3.756355  |

---

Total Energy (a.u.) = -1702.443851; **NIMAG = i273.41**

**Table S-17.** Cartesian coordinates, energy (u.a.) and number of imaginary frequencies (NIMAG)for Transition State (TS2) associated to the departure of 4-CNPO<sup>-</sup> anion for compound **1**, with two water molecules, calculated using WB97XD/6-311++G(d,p) level theory

| Center Number | Atomic Number | Coordinates (Angstroms) |           |           |
|---------------|---------------|-------------------------|-----------|-----------|
|               |               | X                       | Y         | Z         |
| 1             | 6             | 0.974163                | -0.966398 | -0.326893 |
| 2             | 16            | 0.314928                | -0.428335 | -1.804894 |
| 3             | 8             | 0.272418                | -1.802185 | 0.520366  |
| 4             | 8             | 1.086131                | 0.509242  | 0.884607  |
| 5             | 6             | -1.023750               | -1.504176 | 0.847024  |
| 6             | 6             | -2.070065               | -1.880139 | 0.016175  |
| 7             | 6             | -1.261527               | -0.877068 | 2.068123  |
| 8             | 6             | -3.363188               | -1.599314 | 0.442313  |
| 9             | 1             | -1.879676               | -2.358660 | -0.934452 |
| 10            | 6             | -2.570106               | -0.616122 | 2.465319  |
| 11            | 1             | -0.408094               | -0.585040 | 2.668511  |
| 12            | 6             | -3.639522               | -0.974603 | 1.652464  |
| 13            | 1             | -2.755259               | -0.115539 | 3.409460  |
| 14            | 1             | -4.665446               | -0.770398 | 1.930656  |
| 15            | 6             | 0.733815                | 1.733229  | 0.560251  |
| 16            | 6             | 1.687138                | 2.776652  | 0.626893  |
| 17            | 6             | -0.582450               | 2.063560  | 0.166786  |
| 18            | 6             | 1.343174                | 4.082145  | 0.329639  |
| 19            | 1             | 2.698533                | 2.526333  | 0.934249  |
| 20            | 6             | -0.923650               | 3.368934  | -0.146486 |
| 21            | 1             | -1.334231               | 1.285327  | 0.122113  |
| 22            | 6             | 0.031379                | 4.393405  | -0.066626 |
| 23            | 1             | 2.084954                | 4.872427  | 0.395329  |
| 24            | 1             | -1.938755               | 3.598682  | -0.454606 |
| 25            | 7             | -4.479322               | -1.960094 | -0.431458 |
| 26            | 8             | -4.224560               | -2.297840 | -1.583006 |
| 27            | 8             | -5.612465               | -1.908014 | 0.027235  |
| 28            | 6             | -0.321641               | 5.746622  | -0.374159 |
| 29            | 7             | -0.599284               | 6.849463  | -0.616146 |
| 30            | 6             | 4.027849                | -3.093700 | -0.142060 |
| 31            | 6             | 2.585675                | -2.766870 | -0.504793 |
| 32            | 6             | 3.272965                | -0.505073 | -0.942636 |
| 33            | 6             | 4.686598                | -0.893241 | -0.540886 |
| 34            | 1             | 2.409711                | -2.979599 | -1.573374 |
| 35            | 1             | 1.911937                | -3.383724 | 0.092380  |
| 36            | 1             | 4.166570                | -2.993746 | 0.947514  |
| 37            | 1             | 4.263588                | -4.121911 | -0.429785 |
| 38            | 1             | 3.144496                | -0.611854 | -2.030288 |
| 39            | 1             | 3.078310                | 0.534888  | -0.673863 |

|    |   |           |           |           |
|----|---|-----------|-----------|-----------|
| 40 | 1 | 5.414175  | -0.318702 | -1.119022 |
| 41 | 1 | 4.839327  | -0.692695 | 0.530645  |
| 42 | 7 | 2.331337  | -1.352402 | -0.220117 |
| 43 | 8 | 4.948904  | -2.262288 | -0.817304 |
| 44 | 8 | -2.905790 | 0.541591  | -2.084897 |
| 45 | 1 | -1.959511 | 0.374596  | -1.935940 |
| 46 | 1 | -3.251823 | -0.309689 | -2.371780 |
| 47 | 8 | 2.887733  | -0.484882 | 2.701048  |
| 48 | 1 | 2.965818  | -1.222073 | 2.084524  |
| 49 | 1 | 2.267273  | 0.073913  | 2.193007  |

---

Total Energy (a.u.) = -1778.506327; **NIMAG = i247.82\***

**Table S-18.** Cartesian coordinates, energy (u.a.) and number of imaginary frequencies (NIMAG)for Transition State (TS2) associated to the departure of 3-NPO<sup>-</sup> anion for compound **1**, with two explicit water molecules, calculated using WB97XD/6-311++G(d,p) level theory

| Center Number | Atomic Number | Coordinates (Angstroms) |           |           |
|---------------|---------------|-------------------------|-----------|-----------|
|               |               | X                       | Y         | Z         |
| 1             | 6             | 0.974163                | -0.966398 | -0.326893 |
| 2             | 16            | 0.314928                | -0.428335 | -1.804894 |
| 3             | 8             | 0.272418                | -1.802185 | 0.520366  |
| 4             | 8             | 1.086131                | 0.509242  | 0.884607  |
| 5             | 6             | -1.023750               | -1.504176 | 0.847024  |
| 6             | 6             | -2.070065               | -1.880139 | 0.016175  |
| 7             | 6             | -1.261527               | -0.877068 | 2.068123  |
| 8             | 6             | -3.363188               | -1.599313 | 0.442313  |
| 9             | 1             | -1.879676               | -2.358660 | -0.934452 |
| 10            | 6             | -2.570106               | -0.616122 | 2.465319  |
| 11            | 1             | -0.408094               | -0.585040 | 2.668511  |
| 12            | 6             | -3.639522               | -0.974602 | 1.652464  |
| 13            | 1             | -2.755259               | -0.115539 | 3.409460  |
| 14            | 1             | -4.665446               | -0.770397 | 1.930656  |
| 15            | 6             | 0.733815                | 1.733229  | 0.560251  |
| 16            | 6             | 1.687138                | 2.776652  | 0.626893  |
| 17            | 6             | -0.582450               | 2.063560  | 0.166786  |
| 18            | 6             | 1.343175                | 4.082145  | 0.329639  |
| 19            | 1             | 2.698533                | 2.526333  | 0.934249  |
| 20            | 6             | -0.923649               | 3.368934  | -0.146486 |
| 21            | 1             | -1.334231               | 1.285327  | 0.122113  |
| 22            | 6             | 0.031380                | 4.393405  | -0.066626 |
| 23            | 1             | 2.084955                | 4.872427  | 0.395329  |
| 24            | 1             | -1.938754               | 3.598682  | -0.454606 |
| 25            | 7             | -4.479322               | -1.960093 | -0.431458 |
| 26            | 8             | -4.224560               | -2.297839 | -1.583006 |
| 27            | 8             | -5.612465               | -1.908013 | 0.027235  |
| 28            | 6             | -0.321640               | 5.746622  | -0.374159 |
| 29            | 7             | -0.599283               | 6.849463  | -0.616146 |
| 30            | 6             | 4.027848                | -3.093701 | -0.142060 |
| 31            | 6             | 2.585674                | -2.766870 | -0.504793 |
| 32            | 6             | 3.272965                | -0.505074 | -0.942636 |
| 33            | 6             | 4.686598                | -0.893242 | -0.540886 |
| 34            | 1             | 2.409710                | -2.979599 | -1.573374 |
| 35            | 1             | 1.911936                | -3.383724 | 0.092380  |
| 36            | 1             | 4.166569                | -2.993747 | 0.947514  |
| 37            | 1             | 4.263587                | -4.121912 | -0.429785 |
| 38            | 1             | 3.144496                | -0.611855 | -2.030288 |
| 39            | 1             | 3.078310                | 0.534887  | -0.673863 |

|    |   |           |           |           |
|----|---|-----------|-----------|-----------|
| 40 | 1 | 5.414175  | -0.318703 | -1.119022 |
| 41 | 1 | 4.839327  | -0.692696 | 0.530645  |
| 42 | 7 | 2.331337  | -1.352402 | -0.220117 |
| 43 | 8 | 4.948904  | -2.262289 | -0.817304 |
| 44 | 8 | -2.905790 | 0.541591  | -2.084897 |
| 45 | 1 | -1.959511 | 0.374596  | -1.935940 |
| 46 | 1 | -3.251823 | -0.309689 | -2.371780 |
| 47 | 8 | 2.887733  | -0.484883 | 2.701048  |
| 48 | 1 | 2.965818  | -1.222074 | 2.084524  |
| 49 | 1 | 2.267273  | 0.073913  | 2.193007  |

---

Total Energy (a.u.)= -1778.50518; **NIMAG = i273.41**

**Table S-19.** Cartesian coordinates, energy (u.a.) and number of imaginary frequencies (NIMAG) for Transition State (TS2) associated to the departure of 4-CNPO<sup>-</sup> anion for compound **1**, with three water molecules, calculated using WB97XD/6-311++G(d,p) level theory

| Center Number | Atomic Number | Coordinates (Angstroms) |           |           |
|---------------|---------------|-------------------------|-----------|-----------|
|               |               | X                       | Y         | Z         |
| 1             | 6             | -0.024027               | 0.542097  | 0.512373  |
| 2             | 16            | 0.161593                | 0.054819  | 2.171676  |
| 3             | 8             | -1.333407               | 0.585238  | -0.004462 |
| 4             | 8             | 0.499604                | -0.791432 | -0.558094 |
| 5             | 6             | -2.262932               | -0.397471 | 0.139172  |
| 6             | 6             | -3.567078               | 0.009486  | -0.138050 |
| 7             | 6             | -2.001691               | -1.728702 | 0.477396  |
| 8             | 6             | -4.588297               | -0.928850 | -0.070572 |
| 9             | 1             | -3.776972               | 1.039008  | -0.398579 |
| 10            | 6             | -3.054559               | -2.637016 | 0.541811  |
| 11            | 1             | -0.985837               | -2.034985 | 0.671957  |
| 12            | 6             | -4.363876               | -2.256666 | 0.270894  |
| 13            | 1             | -2.842071               | -3.668229 | 0.803479  |
| 14            | 1             | -5.188464               | -2.956050 | 0.313482  |
| 15            | 6             | 1.778039                | -1.133497 | -0.490088 |
| 16            | 6             | 2.709016                | -0.591342 | -1.395777 |
| 17            | 6             | 2.233481                | -2.060461 | 0.468703  |
| 18            | 6             | 4.044603                | -0.956234 | -1.350678 |
| 19            | 1             | 2.348611                | 0.101563  | -2.146703 |
| 20            | 6             | 3.568478                | -2.429114 | 0.516817  |
| 21            | 1             | 1.520674                | -2.468528 | 1.175139  |
| 22            | 6             | 4.487864                | -1.877740 | -0.389921 |
| 23            | 1             | 4.752788                | -0.536902 | -2.058280 |
| 24            | 1             | 3.911347                | -3.141067 | 1.260621  |
| 25            | 7             | -5.956579               | -0.496652 | -0.374970 |
| 26            | 8             | -6.131770               | 0.661882  | -0.727100 |
| 27            | 8             | -6.856064               | -1.321337 | -0.264285 |
| 28            | 6             | 5.866477                | -2.270739 | -0.350602 |
| 29            | 7             | 6.982387                | -2.592197 | -0.324441 |
| 30            | 6             | 1.383641                | 2.959969  | -1.911563 |
| 31            | 6             | 0.219224                | 2.246739  | -1.233871 |
| 32            | 6             | 1.372938                | 2.566952  | 0.883823  |
| 33            | 6             | 2.501228                | 3.219712  | 0.107407  |
| 34            | 1             | -0.580950               | 2.977148  | -1.034127 |
| 35            | 1             | -0.171662               | 1.481877  | -1.907573 |
| 36            | 1             | 2.115485                | 2.220537  | -2.271114 |
| 37            | 1             | 1.015243                | 3.528017  | -2.769603 |
| 38            | 1             | 0.674507                | 3.333488  | 1.252811  |
| 39            | 1             | 1.786807                | 2.034970  | 1.736395  |

|    |   |           |           |           |
|----|---|-----------|-----------|-----------|
| 40 | 1 | 2.987603  | 3.979151  | 0.723247  |
| 41 | 1 | 3.244891  | 2.457199  | -0.172632 |
| 42 | 7 | 0.657521  | 1.634393  | 0.017477  |
| 43 | 8 | 2.027873  | 3.880762  | -1.056364 |
| 44 | 8 | 3.480971  | 0.378411  | 2.541311  |
| 45 | 1 | 2.524912  | 0.191636  | 2.516304  |
| 46 | 1 | 3.831084  | -0.110320 | 1.790227  |
| 47 | 8 | -1.896554 | 2.765783  | 2.107582  |
| 48 | 1 | -2.020886 | 2.467905  | 1.200778  |
| 49 | 1 | -1.334393 | 2.066843  | 2.479720  |
| 50 | 8 | -0.788353 | -0.640246 | -3.005998 |
| 51 | 1 | -0.302227 | -0.748171 | -2.163691 |
| 52 | 1 | -1.712865 | -0.726204 | -2.759510 |

---

Total Energy (a.u.) = -1854.561346; **NIMAG = i268.12**

**Table S-20.** Cartesian coordinates, energy (u.a.) and number of imaginary frequencies (NIMAG) for Transition State (TS2) associated to the departure of 3-NPO<sup>-</sup> anion for compound **1**, with three explicit water molecules, calculated using WB97XD/6-311++G(d,p) level theory

| Center Number | Atomic Number | Coordinates (Angstroms) |           |           |
|---------------|---------------|-------------------------|-----------|-----------|
|               |               | X                       | Y         | Z         |
| 1             | 6             | -0.354408               | 0.358247  | 0.019168  |
| 2             | 16            | 0.169942                | -0.133545 | -1.557195 |
| 3             | 8             | 0.973260                | -0.005349 | 1.228232  |
| 4             | 8             | -1.251402               | -0.530466 | 0.654856  |
| 5             | 6             | 1.882851                | -0.900453 | 0.876672  |
| 6             | 6             | 3.052540                | -0.490245 | 0.225231  |
| 7             | 6             | 1.706838                | -2.270199 | 1.125296  |
| 8             | 6             | 3.987767                | -1.438512 | -0.151481 |
| 9             | 1             | 3.204283                | 0.560482  | 0.023336  |
| 10            | 6             | 2.666207                | -3.196830 | 0.741157  |
| 11            | 1             | 0.797809                | -2.584971 | 1.624167  |
| 12            | 6             | 3.827319                | -2.796029 | 0.094288  |
| 13            | 1             | 2.504588                | -4.250732 | 0.939031  |
| 14            | 1             | 4.584161                | -3.500537 | -0.220162 |
| 15            | 6             | -2.514528               | -0.687943 | 0.194120  |
| 16            | 6             | -3.165559               | 0.177696  | -0.685740 |
| 17            | 6             | -3.185478               | -1.799301 | 0.712365  |
| 18            | 6             | -4.481007               | -0.078916 | -1.034414 |
| 19            | 1             | -2.660185               | 1.038036  | -1.101657 |
| 20            | 6             | -4.499525               | -2.043701 | 0.368582  |
| 21            | 1             | -2.648167               | -2.467099 | 1.375204  |
| 22            | 6             | -5.161540               | -1.180972 | -0.511355 |
| 23            | 1             | -4.983936               | 0.587876  | -1.724600 |
| 24            | 1             | -5.016946               | -2.906316 | 0.771372  |
| 25            | 7             | 5.194945                | -0.993074 | -0.857465 |
| 26            | 8             | 5.228826                | 0.151542  | -1.283187 |
| 27            | 8             | 6.110374                | -1.784230 | -0.989217 |
| 28            | 6             | -6.524405               | -1.430216 | -0.868636 |
| 29            | 7             | -7.624491               | -1.635032 | -1.148529 |
| 30            | 6             | 1.129606                | 3.326309  | 0.624858  |
| 31            | 6             | 0.074863                | 2.761043  | -0.314882 |
| 32            | 6             | -1.173362               | 2.049021  | 1.623544  |
| 33            | 6             | -0.091154               | 2.674474  | 2.500726  |
| 34            | 1             | -0.656617               | 3.541490  | -0.556949 |
| 35            | 1             | 0.538521                | 2.413823  | -1.233268 |
| 36            | 1             | 1.891581                | 2.561596  | 0.819850  |
| 37            | 1             | 1.606186                | 4.198742  | 0.175706  |
| 38            | 1             | -1.970999               | 2.782119  | 1.452356  |
| 39            | 1             | -1.597413               | 1.185994  | 2.130302  |



|    |   |           |           |           |
|----|---|-----------|-----------|-----------|
| 40 | 1 | -0.540602 | 3.079287  | 3.409857  |
| 41 | 1 | 0.645315  | 1.910615  | 2.771257  |
| 42 | 7 | -0.647504 | 1.662672  | 0.314618  |
| 43 | 8 | 0.545302  | 3.755954  | 1.844040  |
| 44 | 8 | -1.757564 | 2.018978  | -3.101830 |
| 45 | 1 | -1.201835 | 1.297721  | -2.753417 |
| 46 | 1 | -1.135470 | 2.735339  | -3.233381 |
| 47 | 8 | 2.787547  | 1.822194  | -2.259296 |
| 48 | 1 | 3.605849  | 1.350133  | -2.079093 |
| 49 | 1 | 2.088394  | 1.167357  | -2.100540 |
| 50 | 8 | -0.415640 | -0.742264 | 3.547478  |
| 51 | 1 | 0.148861  | -0.465347 | 2.800565  |
| 52 | 1 | -1.210888 | -1.032551 | 3.099224  |

---

Total Energy (a.u.) = -1854.560868; **NIMAG = i293.71**

**Table S-21.** Cartesian coordinates, energy (u.a.) and number of imaginary frequencies (NIMAG) for Transition State (TS2) associated to the departure of 4-CNPO<sup>-</sup> anion for compound **1**, with four water molecules, calculated using WB97XD/6-311++G(d,p) level theory

| Center Number | Atomic Number | Coordinates (Angstroms) |           |           |
|---------------|---------------|-------------------------|-----------|-----------|
|               |               | X                       | Y         | Z         |
| 1             | 6             | 0.222074                | 0.604905  | 0.350735  |
| 2             | 16            | 0.388401                | 0.433912  | -1.380777 |
| 3             | 8             | 1.335706                | 0.436446  | 1.122076  |
| 4             | 8             | -0.591033               | -0.880601 | 0.957847  |
| 5             | 6             | 2.312573                | -0.466991 | 0.824569  |
| 6             | 6             | 3.387436                | -0.052546 | 0.061764  |
| 7             | 6             | 2.283513                | -1.735137 | 1.370619  |
| 8             | 6             | 4.409776                | -0.949519 | -0.165069 |
| 9             | 1             | 3.410371                | 0.936921  | -0.342329 |
| 10            | 6             | 3.332742                | -2.611181 | 1.131623  |
| 11            | 1             | 1.451198                | -2.025499 | 1.978247  |
| 12            | 6             | 4.407925                | -2.231000 | 0.356025  |
| 13            | 1             | 3.304980                | -3.597818 | 1.556484  |
| 14            | 1             | 5.224317                | -2.894896 | 0.157615  |
| 15            | 6             | -1.674268               | -1.353052 | 0.403814  |
| 16            | 6             | -2.945308               | -0.961926 | 0.852658  |
| 17            | 6             | -1.605284               | -2.306040 | -0.626645 |
| 18            | 6             | -4.089826               | -1.508007 | 0.312679  |
| 19            | 1             | -3.009053               | -0.235614 | 1.639918  |
| 20            | 6             | -2.748165               | -2.847818 | -1.164432 |
| 21            | 1             | -0.636845               | -2.594461 | -0.985891 |
| 22            | 6             | -4.005919               | -2.457238 | -0.701952 |
| 23            | 1             | -5.055103               | -1.203839 | 0.676727  |
| 24            | 1             | -2.677896               | -3.577862 | -1.950737 |
| 25            | 7             | 5.536550                | -0.532203 | -0.998202 |
| 26            | 8             | 5.448669                | 0.498708  | -1.583811 |
| 27            | 8             | 6.483686                | -1.248895 | -1.049906 |
| 28            | 6             | -5.198788               | -3.043607 | -1.249639 |
| 29            | 7             | -6.139497               | -3.509092 | -1.676221 |
| 30            | 6             | -1.640504               | 2.610965  | 2.833403  |
| 31            | 6             | -0.400046               | 1.908435  | 2.308128  |
| 32            | 6             | -0.970100               | 2.756997  | 0.101859  |
| 33            | 6             | -2.186345               | 3.408663  | 0.731122  |
| 34            | 1             | 0.468620                | 2.548657  | 2.460221  |
| 35            | 1             | -0.247775               | 0.998574  | 2.867027  |
| 36            | 1             | -2.481796               | 1.917325  | 2.843478  |
| 37            | 1             | -1.466403               | 2.946183  | 3.848956  |
| 38            | 1             | -0.154613               | 3.479905  | 0.048001  |
| 39            | 1             | -1.218749               | 2.453793  | -0.896783 |

|    |   |           |           |           |
|----|---|-----------|-----------|-----------|
| 40 | 1 | -2.423441 | 4.323215  | 0.206638  |
| 41 | 1 | -3.041088 | 2.737616  | 0.650947  |
| 42 | 7 | -0.564560 | 1.598728  | 0.892063  |
| 43 | 8 | -1.965015 | 3.738117  | 2.076592  |
| 44 | 8 | 3.027238  | 2.764814  | -2.061717 |
| 45 | 1 | 2.228675  | 2.262542  | -1.984660 |
| 46 | 1 | 3.686449  | 2.142202  | -2.317878 |
| 47 | 8 | -2.947625 | 3.618747  | -2.796868 |
| 48 | 1 | -2.094800 | 3.742155  | -3.175176 |
| 49 | 1 | -3.056161 | 2.676595  | -2.764287 |
| 50 | 8 | -2.787258 | 0.711939  | -2.651058 |
| 51 | 1 | -1.894961 | 0.542865  | -2.371410 |
| 52 | 1 | -3.317580 | 0.122954  | -2.142289 |
| 53 | 8 | -0.575082 | -1.695968 | 3.696556  |
| 54 | 1 | -1.266029 | -2.334328 | 3.691665  |
| 55 | 1 | -0.557383 | -1.353680 | 2.809213  |

---

Total Energy (a.u.) = -1930.621708; **NIMAG = i262.62**

**Table S-22.** Cartesian coordinates, energy (u.a.) and number of imaginary frequencies (NIMAG) for Transition State (TS2) associated to the departure of 3-NPO<sup>-</sup> anion for compound **1**, with four explicit water molecules, calculated using WB97XD/6-311++G(d,p) level theory

| Center Number | Atomic Number | Coordinates (Angstroms) |           |           |
|---------------|---------------|-------------------------|-----------|-----------|
|               |               | X                       | Y         | Z         |
| 1             | 6             | 1.231382                | -0.171849 | -0.201546 |
| 2             | 16            | 0.495487                | -0.051034 | -1.784207 |
| 3             | 8             | 0.724270                | -1.728069 | 0.508031  |
| 4             | 8             | 0.783039                | 0.665149  | 0.816510  |
| 5             | 6             | -0.559600               | -1.795798 | 0.874936  |
| 6             | 6             | -1.554313               | -2.180113 | -0.034188 |
| 7             | 6             | -0.940282               | -1.469336 | 2.185680  |
| 8             | 6             | -2.871828               | -2.219158 | 0.394551  |
| 9             | 1             | -1.292615               | -2.457916 | -1.044787 |
| 10            | 6             | -2.270224               | -1.518756 | 2.580421  |
| 11            | 1             | -0.165094               | -1.188145 | 2.887323  |
| 12            | 6             | -3.261951               | -1.895317 | 1.686136  |
| 13            | 1             | -2.537555               | -1.257911 | 3.598228  |
| 14            | 1             | -4.304781               | -1.944841 | 1.966295  |
| 15            | 6             | -0.054466               | 1.727356  | 0.584686  |
| 16            | 6             | 0.504494                | 3.000865  | 0.614146  |
| 17            | 6             | -1.421852               | 1.552859  | 0.421533  |
| 18            | 6             | -0.309559               | 4.112312  | 0.477343  |
| 19            | 1             | 1.576214                | 3.105538  | 0.724597  |
| 20            | 6             | -2.236003               | 2.661970  | 0.263547  |
| 21            | 1             | -1.845676               | 0.559762  | 0.384462  |
| 22            | 6             | -1.685698               | 3.945081  | 0.298622  |
| 23            | 1             | 0.115609                | 5.108713  | 0.502087  |
| 24            | 1             | -3.296440               | 2.525139  | 0.094527  |
| 25            | 7             | -3.910678               | -2.627308 | -0.560943 |
| 26            | 8             | -3.630401               | -2.634860 | -1.748260 |
| 27            | 8             | -5.001729               | -2.938613 | -0.121870 |
| 28            | 6             | -2.526414               | 5.097461  | 0.158395  |
| 29            | 7             | -3.193010               | 6.032371  | 0.056191  |
| 30            | 6             | 4.656604                | -1.508613 | -0.621228 |
| 31            | 6             | 3.339028                | -0.976676 | -1.159227 |
| 32            | 6             | 3.417536                | 0.721071  | 0.558876  |
| 33            | 6             | 4.740513                | 0.125954  | 1.020114  |
| 34            | 1             | 3.525543                | -0.275823 | -1.985848 |
| 35            | 1             | 2.753507                | -1.809890 | -1.541947 |
| 36            | 1             | 4.458089                | -2.291492 | 0.125302  |
| 37            | 1             | 5.246107                | -1.934123 | -1.435055 |
| 38            | 1             | 3.597617                | 1.548067  | -0.144858 |

|    |   |           |           |           |
|----|---|-----------|-----------|-----------|
| 39 | 1 | 2.890424  | 1.115747  | 1.425892  |
| 40 | 1 | 5.386232  | 0.916658  | 1.408895  |
| 41 | 1 | 4.550301  | -0.612245 | 1.812094  |
| 42 | 7 | 2.611631  | -0.311816 | -0.087423 |
| 43 | 8 | 5.444092  | -0.485004 | -0.041239 |
| 44 | 8 | -2.851709 | 0.268333  | -2.100453 |
| 45 | 1 | -1.891011 | 0.258566  | -1.971256 |
| 46 | 1 | -3.064773 | -0.647690 | -2.299803 |
| 47 | 8 | 2.319410  | 2.657958  | -2.143268 |
| 48 | 1 | 1.864636  | 1.797656  | -2.176957 |
| 49 | 1 | 1.593018  | 3.275645  | -2.044335 |
| 50 | 8 | 1.026630  | -3.437187 | -1.792597 |
| 51 | 1 | 1.017146  | -3.080143 | -0.891485 |
| 52 | 1 | 0.808238  | -2.650168 | -2.304840 |
| 53 | 8 | 2.325588  | -1.587010 | 2.880409  |
| 54 | 1 | 1.922035  | -1.769082 | 2.012850  |
| 55 | 1 | 2.312111  | -0.629633 | 2.916274  |

---

Total Energy (a.u.) = -1930.621596; **NIMAG = i282.34**

**Table S-23.** Cartesian coordinates, energy (u.a.) and number of imaginary frequencies (NIMAG) for Transition State (TS2) associated to the departure of 4CNPO<sup>-</sup> anion for compound **1**, with one explicit ethanol molecule, calculated using WB97XD/6-311++G(d,p) level theory

| Center Number | Atomic Number | Coordinates (Angstroms) |           |           |
|---------------|---------------|-------------------------|-----------|-----------|
|               |               | X                       | Y         | Z         |
| 1             | 6             | 0.100308                | 0.852124  | 0.552239  |
| 2             | 16            | 0.610298                | 2.499820  | 0.456341  |
| 3             | 8             | 1.083434                | -0.137392 | 0.635371  |
| 4             | 8             | -0.648730               | 0.487167  | -1.013007 |
| 5             | 6             | 2.221450                | -0.094515 | -0.103339 |
| 6             | 6             | 3.326804                | -0.702355 | 0.476001  |
| 7             | 6             | 2.304018                | 0.437527  | -1.390848 |
| 8             | 6             | 4.504932                | -0.772543 | -0.251747 |
| 9             | 1             | 3.266701                | -1.107932 | 1.475927  |
| 10            | 6             | 3.504267                | 0.356361  | -2.084514 |
| 11            | 1             | 1.432549                | 0.900303  | -1.829221 |
| 12            | 6             | 4.623334                | -0.248737 | -1.529663 |
| 13            | 1             | 3.564109                | 0.772469  | -3.083275 |
| 14            | 1             | 5.560906                | -0.321549 | -2.062424 |
| 15            | 6             | -1.484859               | -0.536456 | -1.081400 |
| 16            | 6             | -1.177282               | -1.812338 | -0.569163 |
| 17            | 6             | -2.743473               | -0.348292 | -1.685575 |
| 18            | 6             | -2.087811               | -2.846481 | -0.657914 |
| 19            | 1             | -0.216170               | -1.967510 | -0.098772 |
| 20            | 6             | -3.649027               | -1.386370 | -1.779847 |
| 21            | 1             | -2.993039               | 0.637447  | -2.062059 |
| 22            | 6             | -3.335194               | -2.649013 | -1.262508 |
| 23            | 1             | -1.837636               | -3.824111 | -0.260544 |
| 24            | 1             | -4.614545               | -1.224831 | -2.246305 |
| 25            | 7             | 5.670254                | -1.424381 | 0.361462  |
| 26            | 8             | 5.536163                | -1.918627 | 1.465964  |
| 27            | 8             | 6.713417                | -1.440248 | -0.268319 |
| 28            | 6             | -4.272730               | -3.722870 | -1.353159 |
| 29            | 7             | -5.029914               | -4.591344 | -1.427504 |
| 30            | 6             | -1.806077               | -0.845952 | 3.262532  |
| 31            | 6             | -0.589619               | -0.108337 | 2.721929  |
| 32            | 6             | -2.083670               | 1.325814  | 1.497232  |
| 33            | 6             | -3.250884               | 0.532706  | 2.061089  |
| 34            | 1             | -0.291959               | 0.692351  | 3.419539  |
| 35            | 1             | 0.239063                | -0.807052 | 2.622036  |
| 36            | 1             | -2.017287               | -1.708951 | 2.612778  |
| 37            | 1             | -1.615309               | -1.200764 | 4.277899  |
| 38            | 1             | -1.870976               | 2.200300  | 2.129515  |

|    |   |           |           |           |
|----|---|-----------|-----------|-----------|
| 39 | 1 | -2.326911 | 1.688180  | 0.497213  |
| 40 | 1 | -4.118404 | 1.179758  | 2.202918  |
| 41 | 1 | -3.515707 | -0.275888 | 1.363617  |
| 42 | 7 | -0.928046 | 0.447331  | 1.421922  |
| 43 | 8 | -2.944463 | -0.012472 | 3.334403  |
| 44 | 8 | -1.769438 | 2.935469  | -1.907632 |
| 45 | 1 | -1.428173 | 2.062830  | -1.650246 |
| 46 | 6 | -1.104514 | 3.758703  | -0.945829 |
| 47 | 1 | -0.055738 | 3.777889  | -1.157015 |
| 48 | 1 | -1.263673 | 3.361170  | 0.034750  |
| 49 | 6 | -1.668828 | 5.189796  | -1.017396 |
| 50 | 1 | -2.717284 | 5.170815  | -0.804608 |
| 51 | 1 | -1.170160 | 5.806174  | -0.298850 |
| 52 | 1 | -1.511127 | 5.586730  | -1.998453 |

---

Total Energy (a.u.) = - 1748.664578; **NIMAG = i273,55**

**Table S-24.** Cartesian coordinates, energy (u.a.) and number of imaginary frequencies (NIMAG) for Transition State (TS2) associated to the departure of 3NPO<sup>-</sup> anion for compound **1**, with one explicit ethanol molecule, calculated using WB97XD/6-311++G(d,p) level theory

| Center Number | Atomic Number | Coordinates (Angstroms) |           |           |
|---------------|---------------|-------------------------|-----------|-----------|
|               |               | X                       | Y         | Z         |
| 1             | 6             | -0.584059               | 0.922015  | 0.671819  |
| 2             | 16            | -1.189008               | 2.408739  | 0.045632  |
| 3             | 8             | 0.049058                | 0.008132  | -0.742564 |
| 4             | 8             | -1.501305               | 0.008838  | 1.200594  |
| 5             | 6             | 0.933045                | -0.946218 | -0.493150 |
| 6             | 6             | 2.164556                | -0.940659 | -1.169943 |
| 7             | 6             | 0.700830                | -1.969756 | 0.443774  |
| 8             | 6             | 3.090097                | -1.936004 | -0.902747 |
| 9             | 1             | 2.386275                | -0.155420 | -1.881989 |
| 10            | 6             | 1.657652                | -2.942203 | 0.695671  |
| 11            | 1             | -0.241570               | -1.979758 | 0.974974  |
| 12            | 6             | 2.873168                | -2.945719 | 0.025382  |
| 13            | 1             | 1.451215                | -3.716971 | 1.426510  |
| 14            | 1             | 3.628736                | -3.697065 | 0.203651  |
| 15            | 6             | -2.673756               | -0.296531 | 0.596375  |
| 16            | 6             | -3.672361               | -0.762986 | 1.451527  |
| 17            | 6             | -2.894270               | -0.242086 | -0.780789 |
| 18            | 6             | -4.890123               | -1.176170 | 0.943830  |
| 19            | 1             | -3.475015               | -0.787503 | 2.516262  |
| 20            | 6             | -4.116193               | -0.652294 | -1.283095 |
| 21            | 1             | -2.113409               | 0.112750  | -1.435168 |
| 22            | 6             | -5.122254               | -1.121456 | -0.432733 |
| 23            | 1             | -5.665946               | -1.535701 | 1.609340  |
| 24            | 1             | -4.294504               | -0.611892 | -2.351112 |
| 25            | 7             | 4.375384                | -1.916425 | -1.625161 |
| 26            | 8             | 4.563377                | -1.037205 | -2.442778 |
| 27            | 8             | 5.190362                | -2.786546 | -1.363985 |
| 28            | 6             | -6.380664               | -1.547892 | -0.964083 |
| 29            | 7             | -7.396520               | -1.895901 | -1.385599 |
| 30            | 6             | 2.904372                | 1.259742  | 1.819466  |
| 31            | 6             | 1.632318                | 1.770539  | 1.164180  |
| 32            | 6             | 0.373492                | 0.750106  | 2.947804  |
| 33            | 6             | 1.691021                | 0.285870  | 3.551931  |
| 34            | 1             | 1.414386                | 2.796534  | 1.495008  |
| 35            | 1             | 1.753954                | 1.789270  | 0.079929  |
| 36            | 1             | 3.168329                | 0.278987  | 1.397071  |
| 37            | 1             | 3.727380                | 1.954836  | 1.645525  |
| 38            | 1             | 0.077883                | 1.717706  | 3.387294  |



|    |   |           |           |           |
|----|---|-----------|-----------|-----------|
| 39 | 1 | -0.400303 | 0.017568  | 3.169839  |
| 40 | 1 | 1.623971  | 0.269357  | 4.642327  |
| 41 | 1 | 1.910475  | -0.730290 | 3.189296  |
| 42 | 7 | 0.540854  | 0.874683  | 1.509630  |
| 43 | 8 | 2.759331  | 1.149992  | 3.226764  |
| 44 | 8 | 0.954179  | 2.001420  | -2.527063 |
| 45 | 1 | 0.476890  | 1.247734  | -2.141375 |
| 46 | 6 | 0.298617  | 3.083566  | -1.860656 |
| 47 | 1 | -0.760558 | 2.983589  | -1.974901 |
| 48 | 1 | 0.548419  | 3.065589  | -0.820379 |
| 49 | 6 | 0.757520  | 4.418717  | -2.475780 |
| 50 | 1 | 0.268145  | 5.228506  | -1.976126 |
| 51 | 1 | 1.816906  | 4.517997  | -2.362887 |
| 52 | 1 | 0.506357  | 4.437318  | -3.515718 |

---

,Total Energy (a.u.) = -1748.674384; **NIMAG = i270,72**

**Table S-25.** Cartesian coordinates, energy (u.a.) and number of imaginary frequencies (NIMAG) for Transition State (TS2) associated to the departure of 4CNPO<sup>-</sup> anion for compound **1**, with one explicit water molecule and one ethanol molecule, calculated using WB97XD/6-311++G(d,p) level theory

| Center Number | Atomic Number | Coordinates (Angstroms) |           |           |
|---------------|---------------|-------------------------|-----------|-----------|
|               |               | X                       | Y         | Z         |
| 1             | 6             | 0.215527                | 1.005682  | -0.478540 |
| 2             | 16            | 0.712228                | 0.319712  | -1.997851 |
| 3             | 8             | 1.139203                | 1.123928  | 0.525842  |
| 4             | 8             | -0.774177               | -0.209876 | 0.392778  |
| 5             | 6             | 2.100362                | 0.186830  | 0.756441  |
| 6             | 6             | 3.325706                | 0.318897  | 0.133167  |
| 7             | 6             | 1.891618                | -0.812468 | 1.688483  |
| 8             | 6             | 4.321419                | -0.581430 | 0.448704  |
| 9             | 1             | 3.485331                | 1.094579  | -0.584616 |
| 10            | 6             | 2.914197                | -1.699874 | 1.987196  |
| 11            | 1             | 0.939518                | -0.885210 | 2.172687  |
| 12            | 6             | 4.143033                | -1.597522 | 1.367496  |
| 13            | 1             | 2.745232                | -2.477960 | 2.708936  |
| 14            | 1             | 4.941530                | -2.278587 | 1.579072  |
| 15            | 6             | -1.771886               | -0.824898 | -0.186867 |
| 16            | 6             | -3.081834               | -0.337171 | -0.068614 |
| 17            | 6             | -1.576779               | -2.020101 | -0.897907 |
| 18            | 6             | -4.145866               | -1.012067 | -0.626115 |
| 19            | 1             | -3.242430               | 0.571241  | 0.480143  |
| 20            | 6             | -2.639472               | -2.689972 | -1.453812 |
| 21            | 1             | -0.576568               | -2.391336 | -1.002277 |
| 22            | 6             | -3.938212               | -2.195980 | -1.325051 |
| 23            | 1             | -5.144194               | -0.625668 | -0.520404 |
| 24            | 1             | -2.472922               | -3.603862 | -1.995697 |
| 25            | 7             | 5.613571                | -0.458253 | -0.222225 |
| 26            | 8             | 5.705998                | 0.318233  | -1.118850 |
| 27            | 8             | 6.509431                | -1.133198 | 0.169565  |
| 28            | 6             | -5.049622               | -2.904875 | -1.897480 |
| 29            | 7             | -5.928880               | -3.463804 | -2.343736 |
| 30            | 6             | -1.993198               | 3.684967  | 0.800767  |
| 31            | 6             | -0.695393               | 2.895786  | 0.771641  |
| 32            | 6             | -0.855336               | 2.897849  | -1.654377 |
| 33            | 6             | -2.151388               | 3.672585  | -1.507106 |
| 34            | 1             | 0.147088                | 3.584816  | 0.843559  |
| 35            | 1             | -0.666094               | 2.242230  | 1.628714  |
| 36            | 1             | -2.836976               | 3.004469  | 0.911809  |
| 37            | 1             | -1.990874               | 4.363600  | 1.645303  |
| 38            | 1             | -0.033282               | 3.596125  | -1.824425 |

|    |   |           |           |           |
|----|---|-----------|-----------|-----------|
| 39 | 1 | -0.918626 | 2.243121  | -2.505930 |
| 40 | 1 | -2.277023 | 4.344122  | -2.347951 |
| 41 | 1 | -2.992022 | 2.979078  | -1.488586 |
| 42 | 7 | -0.614177 | 2.112619  | -0.453619 |
| 43 | 8 | -2.161737 | 4.462257  | -0.349789 |
| 44 | 8 | 3.608702  | -1.639293 | -2.723419 |
| 45 | 1 | 2.754875  | -1.379655 | -2.410111 |
| 46 | 1 | 4.068858  | -0.825863 | -2.838934 |
| 47 | 8 | -1.394201 | 0.015517  | 3.164964  |
| 48 | 1 | -1.247522 | 0.107980  | 2.228787  |
| 49 | 6 | -2.446325 | -0.947402 | 3.268504  |
| 50 | 1 | -2.084055 | -1.906004 | 2.960700  |
| 51 | 1 | -3.260694 | -0.654945 | 2.639081  |
| 52 | 6 | -2.928698 | -1.025643 | 4.728913  |
| 53 | 1 | -3.714802 | -1.747370 | 4.806701  |
| 54 | 1 | -2.113916 | -1.316460 | 5.358559  |
| 55 | 1 | -3.292533 | -0.067461 | 5.036177  |

---

Total Energy (a.u.) = -1865.127290; **NIMAG = i283.59**

**Table S-26.** Cartesian coordinates, energy (u.a.) and number of imaginary frequencies (NIMAG) for Transition State (TS2) associated to the departure of 3NPO<sup>-</sup> anion for compound **1**, with one explicit water molecule and one ethanol molecule, calculated using WB97XD/6-311++G(d,p) level theory

| Center Number | Atomic Number | Coordinates (Angstroms) |           |           |
|---------------|---------------|-------------------------|-----------|-----------|
|               |               | X                       | Y         | Z         |
| 1             | 6             | 0.009779                | 0.904413  | -0.919979 |
| 2             | 16            | 0.232736                | -0.279440 | -2.169099 |
| 3             | 8             | 0.536314                | 0.177073  | 0.676351  |
| 4             | 8             | -1.258920               | 1.168599  | -0.486375 |
| 5             | 6             | 1.749942                | -0.296614 | 0.802914  |
| 6             | 6             | 2.042896                | -1.622174 | 0.455584  |
| 7             | 6             | 2.793089                | 0.480431  | 1.311544  |
| 8             | 6             | 3.324797                | -2.098130 | 0.605855  |
| 9             | 1             | 1.263894                | -2.248094 | 0.081632  |
| 10            | 6             | 4.073771                | -0.030249 | 1.456943  |
| 11            | 1             | 2.576874                | 1.489484  | 1.607133  |
| 12            | 6             | 4.366694                | -1.331087 | 1.101801  |
| 13            | 1             | 4.852317                | 0.596735  | 1.855171  |
| 14            | 1             | 5.348919                | -1.743367 | 1.204827  |
| 15            | 6             | -2.275980               | 0.273380  | -0.461648 |
| 16            | 6             | -3.480763               | 0.726183  | -0.978500 |
| 17            | 6             | -2.185197               | -0.983789 | 0.113916  |
| 18            | 6             | -4.600534               | -0.074985 | -0.924137 |
| 19            | 1             | -3.518477               | 1.702626  | -1.422882 |
| 20            | 6             | -3.304396               | -1.789986 | 0.151354  |
| 21            | 1             | -1.251818               | -1.317939 | 0.510771  |
| 22            | 6             | -4.516834               | -1.341799 | -0.359732 |
| 23            | 1             | -5.534697               | 0.273392  | -1.324931 |
| 24            | 1             | -3.229203               | -2.774882 | 0.572473  |
| 25            | 7             | 3.603371                | -3.485194 | 0.221428  |
| 26            | 8             | 2.735240                | -4.116478 | -0.292271 |
| 27            | 8             | 4.689959                | -3.916777 | 0.440616  |
| 28            | 6             | -5.687849               | -2.179296 | -0.303716 |
| 29            | 7             | -6.616357               | -2.825248 | -0.257815 |
| 30            | 6             | 2.567029                | 3.474982  | -1.707996 |
| 31            | 6             | 1.492514                | 2.480112  | -2.104120 |
| 32            | 6             | 0.242315                | 3.206758  | -0.145427 |
| 33            | 6             | 1.372684                | 4.180020  | 0.141759  |
| 34            | 1             | 0.832656                | 2.935267  | -2.845170 |
| 35            | 1             | 1.947388                | 1.613775  | -2.551791 |
| 36            | 1             | 3.313862                | 2.980312  | -1.087326 |
| 37            | 1             | 3.056030                | 3.859741  | -2.594958 |
| 38            | 1             | -0.549735               | 3.729041  | -0.684385 |

|    |   |           |           |           |
|----|---|-----------|-----------|-----------|
| 39 | 1 | -0.162056 | 2.852945  | 0.788920  |
| 40 | 1 | 0.974135  | 5.076501  | 0.601249  |
| 41 | 1 | 2.084104  | 3.730187  | 0.832968  |
| 42 | 7 | 0.733272  | 2.080108  | -0.928684 |
| 43 | 8 | 2.035427  | 4.576313  | -1.024813 |
| 44 | 8 | -0.438654 | -3.712547 | -1.150985 |
| 45 | 1 | -0.427032 | -2.852935 | -1.546311 |
| 46 | 1 | 0.461694  | -3.992212 | -1.141344 |
| 47 | 8 | -0.851663 | 1.438046  | 2.860847  |
| 48 | 1 | -0.317530 | 1.090967  | 2.153768  |
| 49 | 6 | -2.192252 | 1.292493  | 2.384889  |
| 50 | 1 | -2.273654 | 1.725961  | 1.410015  |
| 51 | 1 | -2.442222 | 0.253291  | 2.335160  |
| 52 | 6 | -3.159036 | 2.007550  | 3.346982  |
| 53 | 1 | -2.910073 | 3.047052  | 3.395478  |
| 54 | 1 | -4.162290 | 1.897275  | 2.991704  |
| 55 | 1 | -3.076473 | 1.575147  | 4.322231  |

---

Total Energy (a.u.) = -1865.118828; **NIMAG = i290.65**

**Table S-27.** Cartesian coordinates, energy (u.a.) and number of imaginary frequencies (NIMAG) for Transition State (TS2) associated to the departure of 4CNPO<sup>-</sup> anion for compound **1**, with two explicit ethanol molecules, calculated using WB97XD/6-311++G(d,p) level theory

| Center Number | Atomic Number | Coordinates (Angstroms) |           |           |
|---------------|---------------|-------------------------|-----------|-----------|
|               |               | X                       | Y         | Z         |
| 1             | 6             | 0.755915                | -1.100525 | -0.587590 |
| 2             | 16            | -0.289077               | -0.533826 | -1.810469 |
| 3             | 8             | 0.307073                | -1.921466 | 0.428988  |
| 4             | 8             | 1.259300                | 0.363121  | 0.535854  |
| 5             | 6             | -0.828390               | -1.588525 | 1.118509  |
| 6             | 6             | -2.081933               | -1.928673 | 0.629262  |
| 7             | 6             | -0.681622               | -0.963053 | 2.354685  |
| 8             | 6             | -3.186016               | -1.613664 | 1.413095  |
| 9             | 1             | -2.190859               | -2.406076 | -0.334659 |
| 10            | 6             | -1.809499               | -0.667276 | 3.115372  |
| 11            | 1             | 0.317893                | -0.699712 | 2.679825  |
| 12            | 6             | -3.079375               | -0.989407 | 2.650035  |
| 13            | 1             | -1.696806               | -0.167928 | 4.071520  |
| 14            | 1             | -3.973313               | -0.757671 | 3.214645  |
| 15            | 6             | 0.863995                | 1.598879  | 0.325820  |
| 16            | 6             | 1.825693                | 2.613999  | 0.109800  |
| 17            | 6             | -0.499477               | 1.969539  | 0.332249  |
| 18            | 6             | 1.448667                | 3.930805  | -0.076900 |
| 19            | 1             | 2.874927                | 2.332656  | 0.109659  |
| 20            | 6             | -0.878529               | 3.286255  | 0.129421  |
| 21            | 1             | -1.254254               | 1.213553  | 0.510052  |
| 22            | 6             | 0.088092                | 4.282293  | -0.074414 |
| 23            | 1             | 2.200358                | 4.698981  | -0.231707 |
| 24            | 1             | -1.932139               | 3.547147  | 0.129952  |
| 25            | 7             | -4.518374               | -1.936341 | 0.903099  |
| 26            | 8             | -4.620122               | -2.273532 | -0.272056 |
| 27            | 8             | -5.466740               | -1.854794 | 1.671913  |
| 28            | 6             | -0.299181               | 5.647132  | -0.268402 |
| 29            | 7             | -0.602662               | 6.759097  | -0.421159 |
| 30            | 6             | 3.667003                | -3.315910 | -1.296259 |
| 31            | 6             | 2.191986                | -2.945336 | -1.223743 |
| 32            | 6             | 2.788251                | -0.701340 | -1.847238 |
| 33            | 6             | 4.245535                | -1.132666 | -1.873995 |
| 34            | 1             | 1.706229                | -3.145742 | -2.194289 |
| 35            | 1             | 1.703531                | -3.546566 | -0.454989 |
| 36            | 1             | 4.119941                | -3.227301 | -0.294560 |
| 37            | 1             | 3.778329                | -4.348517 | -1.638174 |
| 38            | 1             | 2.345474                | -0.797080 | -2.850072 |
| 39            | 1             | 2.711035                | 0.341959  | -1.535446 |

|    |   |           |           |           |
|----|---|-----------|-----------|-----------|
| 40 | 1 | 4.789769  | -0.575409 | -2.640140 |
| 41 | 1 | 4.709575  | -0.943791 | -0.893834 |
| 42 | 7 | 2.073363  | -1.526085 | -0.880081 |
| 43 | 8 | 4.375519  | -2.506801 | -2.212168 |
| 44 | 8 | -3.421684 | 0.530127  | -1.141919 |
| 45 | 1 | -2.470478 | 0.352901  | -1.238444 |
| 46 | 8 | 3.481756  | -0.694546 | 1.750574  |
| 47 | 1 | 2.748388  | -0.497188 | 1.135310  |
| 48 | 6 | -3.952568 | 0.304626  | -2.450434 |
| 49 | 1 | -3.905749 | -0.739571 | -2.679259 |
| 50 | 1 | -4.970822 | 0.631688  | -2.483458 |
| 51 | 6 | -3.126150 | 1.093917  | -3.482738 |
| 52 | 1 | -2.131269 | 0.701680  | -3.518258 |
| 53 | 1 | -3.579958 | 1.003196  | -4.447481 |
| 54 | 1 | -3.093023 | 2.125279  | -3.199726 |
| 55 | 6 | 3.529269  | 0.552543  | 2.448722  |
| 56 | 1 | 3.597104  | 1.353991  | 1.743045  |
| 57 | 1 | 2.641305  | 0.667374  | 3.034584  |
| 58 | 6 | 4.760808  | 0.576805  | 3.373017  |
| 59 | 1 | 4.795585  | 1.509384  | 3.896455  |
| 60 | 1 | 4.693665  | -0.225492 | 4.077794  |
| 61 | 1 | 5.648855  | 0.463382  | 2.787007  |

-----  
Total Energy (a.u.) = -1843.715480610; **NIMAG = i255.49**

**Table S-28.** Cartesian coordinates, energy (u.a.) and number of imaginary frequencies (NIMAG) for Transition State (TS2) associated to the departure of 3NPO<sup>-</sup> anion for compound **1**, with two explicit ethanol molecule, calculated using WB97XD/6-311++G(d,p) level theory

| Center Number | Atomic Number | Coordinates (Angstroms) |           |           |
|---------------|---------------|-------------------------|-----------|-----------|
|               |               | X                       | Y         | Z         |
| 1             | 6             | 0.041962                | -1.026009 | -0.929421 |
| 2             | 16            | -0.236279               | 0.351334  | -1.947796 |
| 3             | 8             | -0.497042               | -0.614172 | 0.771700  |
| 4             | 8             | 1.323498                | -1.314047 | -0.552424 |
| 5             | 6             | -1.726385               | -0.217364 | 0.982939  |
| 6             | 6             | -2.071542               | 1.136664  | 0.877868  |
| 7             | 6             | -2.735353               | -1.111812 | 1.347032  |
| 8             | 6             | -3.368957               | 1.528969  | 1.112807  |
| 9             | 1             | -1.319606               | 1.848384  | 0.620014  |
| 10            | 6             | -4.032877               | -0.684461 | 1.583450  |
| 11            | 1             | -2.479114               | -2.148331 | 1.457843  |
| 12            | 6             | -4.377197               | 0.646623  | 1.466072  |
| 13            | 1             | -4.784013               | -1.401576 | 1.865170  |
| 14            | 1             | -5.373207               | 0.996105  | 1.642621  |
| 15            | 6             | 2.306680                | -0.398978 | -0.372286 |
| 16            | 6             | 3.522105                | -0.705701 | -0.965827 |
| 17            | 6             | 2.174916                | 0.731268  | 0.418392  |
| 18            | 6             | 4.611638                | 0.115668  | -0.773521 |
| 19            | 1             | 3.591673                | -1.585268 | -1.577266 |
| 20            | 6             | 3.263552                | 1.560506  | 0.595067  |
| 21            | 1             | 1.233831                | 0.953300  | 0.871642  |
| 22            | 6             | 4.486524                | 1.257583  | 0.007998  |
| 23            | 1             | 5.553967                | -0.119474 | -1.233288 |
| 24            | 1             | 3.155975                | 2.451103  | 1.185223  |
| 25            | 7             | -3.702354               | 2.950635  | 0.982110  |
| 26            | 8             | -2.862193               | 3.696292  | 0.589428  |
| 27            | 8             | -4.802955               | 3.294177  | 1.274752  |
| 28            | 6             | 5.625956                | 2.116295  | 0.208322  |
| 29            | 7             | 6.530119                | 2.779088  | 0.365418  |
| 30            | 6             | -2.424685               | -3.511988 | -2.155758 |
| 31            | 6             | -1.391946               | -2.421902 | -2.371223 |
| 32            | 6             | -0.097004               | -3.436573 | -0.576425 |
| 33            | 6             | -1.187394               | -4.488171 | -0.464138 |
| 34            | 1             | -0.722523               | -2.712252 | -3.183196 |
| 35            | 1             | -1.883157               | -1.507955 | -2.656322 |
| 36            | 1             | -3.183722               | -3.164666 | -1.455099 |
| 37            | 1             | -2.907170               | -3.751503 | -3.095814 |
| 38            | 1             | 0.708886                | -3.823827 | -1.201862 |
| 39            | 1             | 0.302703                | -3.239222 | 0.404899  |



|    |   |           |           |           |
|----|---|-----------|-----------|-----------|
| 40 | 1 | -0.751268 | -5.436040 | -0.172597 |
| 41 | 1 | -1.908606 | -4.196109 | 0.297958  |
| 42 | 7 | -0.637116 | -2.208384 | -1.145366 |
| 43 | 8 | -1.845811 | -4.695929 | -1.680909 |
| 44 | 8 | 0.316458  | 3.571814  | -0.336782 |
| 45 | 1 | 0.484941  | 2.778958  | -0.824979 |
| 46 | 8 | 0.955564  | -2.188957 | 2.693983  |
| 47 | 1 | 0.402891  | -1.742927 | 2.060442  |
| 48 | 6 | 2.285801  | -1.906285 | 2.251868  |
| 49 | 1 | 2.377957  | -2.156413 | 1.215604  |
| 50 | 1 | 2.493029  | -0.865318 | 2.387311  |
| 51 | 6 | 3.287473  | -2.740085 | 3.072252  |
| 52 | 1 | 3.081239  | -3.781086 | 2.935558  |
| 53 | 1 | 4.282930  | -2.527395 | 2.742512  |
| 54 | 1 | 3.194217  | -2.491103 | 4.108694  |
| 55 | 6 | -0.637276 | 4.296894  | -1.117520 |
| 56 | 1 | -0.769355 | 5.274021  | -0.701976 |
| 57 | 1 | -1.572535 | 3.777136  | -1.111002 |
| 58 | 6 | -0.128205 | 4.419478  | -2.565767 |
| 59 | 1 | -0.082492 | 3.447683  | -3.011217 |
| 60 | 1 | -0.796373 | 5.038254  | -3.127521 |
| 61 | 1 | 0.847955  | 4.857668  | -2.564812 |

---

Total Energy (a.u.) = -1843.726553; **NIMAG = i283.48**
